# Supplementary material for: USP28 deletion and small-molecule inhibition destabilizes c-MYC and elicits regression of squamous cell lung carcinoma
Source: eLife. 2021 Oct 12;10:e71596. doi: 10.7554/eLife.71596 (PMC8553340; doi:10.7554/eLife.71596)
Supplement: Figure 1—figure supplement 1—source data 1. [file elife-71596-fig1-figsupp1-data1.xlsx]

## Sheet: Fig1A
Figure 1 – figure supplement 1A: Cell number (%)
LSCC H226	LSCC H226	LSCC H226
siControl	siMYC-1	siMYC-2		Tukey's multiple comparisons test	Mean Diff.	95.00% CI of diff.	Below threshold?	Summary	Adjusted P Value
99.1677	24.4946	8.32342		siControl vs. siMyc-1	76.1585	72.1514028175371 to 80.1656922157962	Yes	****	<0.000000000000001
100.832	25.2081	11.8906		siControl vs. siMyc-2	86.4243	82.4171280025371 to 90.4314174007962	Yes	****	<0.000000000000001
98.7013	25.974	10.3896
101.299	24.6753	17.1429
98.8764	20.2247	17.9775
101.124	22.4719	15.7303
LSCC H520	LSCC H520	LSCC H520
siControl	siMYC-1	siMYC-2		Tukey's multiple comparisons test	Mean Diff.	95.00% CI of diff.	Below threshold?	Summary	Adjusted P Value
98.3957	38.5027	32.6203		siControl vs. siMyc-1	63.861	60.7586387604669 to 66.9633573395331	Yes	****	<0.000000000000001
101.604	37.4332	31.8717		siControl vs. siMyc-2	70.8118	67.7093934438002 to 73.9141120228665	Yes	****	<0.000000000000001
98.8209	35.7103	28.0741
101.179	35.9349	29.8709
98.4366	35.3214	25.4777
101.563	33.9317	27.2148
CALU-1	CALU-1	CALU-1
siControl	siMYC-1	siMYC-2		Tukey's multiple comparisons test	Mean Diff.	95.00% CI of diff.	Below threshold?	Summary	Adjusted P Value
102.326	40.9302	29.3023		siControl vs. siMyc-1	62.5394	58.0263083448486 to 67.0525794551515	Yes	****	<0.000000000000001
97.6744	38.1395	30.1395		siControl vs. siMyc-2	71.8028	67.2896608115152 to 76.3159319218181	Yes	****	<0.000000000000001
100.529	37.037	31.746
99.4709	40.2116	30.6878
101.661	32.2094	22.1439
98.3392	36.2355	25.1636
LUDLU-1	LUDLU-1	LUDLU-1
siControl	siMYC-1	siMYC-2		Tukey's multiple comparisons test	Mean Diff.	95.00% CI of diff.	Below threshold?	Summary	Adjusted P Value
97.561	36.5854	13.4146		siControl vs. siMyc-1	69.1282	63.2162194039698 to 75.0401728960302	Yes	****	<0.000000000000001
102.439	31.7073	19.5122		siControl vs. siMyc-2	79.193	73.2810273206365 to 85.1049808126969	Yes	****	<0.000000000000001
98.4127	25.3968	22.2222
101.587	30.7937	28.5714
102.804	28.0374	18.6916
97.1963	32.7103	22.4299

## Sheet: Fig1B
Figure 1 – figure supplement 1B: Cell number (%)
LSCC H226	LSCC H226	LSCC H226
siControl	siJUN-1	siJUN-2		Tukey's multiple comparisons test	Mean Diff.	95.00% CI of diff.	Below threshold?	Summary	Adjusted P Value
102.326	20.9302	16.2791		siControl vs. siJun-1	81.4265	78.5190386306289 to 84.3339132360378	Yes	****	<0.000000000000001
97.6744	19.0698	15.1163		siControl vs. siJun-2	86.1405	83.2331047806289 to 89.0479793860378	Yes	****	<0.000000000000001
98.7654	19.7531	14.8148
101.235	18.0247	13.5802
99.0099	14.8515	10.8911
100.99	18.8119	12.4752
LSCC H520	LSCC H520	LSCC H520
siControl	siJUN-1	siJUN-2		Tukey's multiple comparisons test	Mean Diff.	95.00% CI of diff.	Below threshold?	Summary	Adjusted P Value
98.9796	64.2857	84.6939		siControl vs. siJun-1	39.8163	34.0024783733937 to 45.6301863599397	Yes	****	4.7571e-11
101.02	62.2449	86.7347		siControl vs. siJun-2	19.8308	14.0169229900603 to 25.6446309766064	Yes	****	6.84266e-07
98.9362	61.7021	82.9787
101.064	59.5745	79.7872
101.734	57.8035	72.8324
98.2659	55.4913	73.9884
CALU-1	CALU-1	CALU-1
siControl	siJUN-1	siJUN-2		Tukey's multiple comparisons test	Mean Diff.	95.00% CI of diff.	Below threshold?	Summary	Adjusted P Value
101.124	33.7079	38.2022		siControl vs. siJun-1	71.8058	67.2552833835334 to 76.3562964831332	Yes	****	<0.000000000000001
98.8764	31.4607	40.4494		siControl vs. siJun-2	62.1049	57.5543792002001 to 66.6553922997999	Yes	****	<0.000000000000001
97.561	29.2683	36.5854
102.439	26.8293	39.0244
97.479	26.0504	34.4538
102.521	21.8487	38.6555
LUDLU-1	LUDLU-1	LUDLU-1
siControl	siJUN-1	siJUN-2		Tukey's multiple comparisons test	Mean Diff.	95.00% CI of diff.	Below threshold?	Summary	Adjusted P Value
102.439	29.2683	24.3902		siControl vs. siJun-1	73.2458	69.9406814939335 to 76.5509868060665	Yes	****	<0.000000000000001
97.561	25.6098	29.2683		siControl vs. siJun-2	71.6459	68.3407161772668 to 74.9510214893998	Yes	****	<0.000000000000001
98.7013	23.3766	28.5714
101.299	25.974	29.8701
101.235	29.6296	27.1605
98.7654	26.6667	30.8642

## Sheet: Fig1C
Figure 1 – figure supplement 1C: Cell number (%)
LSCC H226	LSCC H226	LSCC H226
siControl	sip63-1	sip63-2		Tukey's multiple comparisons test	Mean Diff.	95.00% CI of diff.	Below threshold?	Summary	Adjusted P Value
101.075	36.5591	27.957		siControl vs. sip63-1	64.5757	61.8411922128817 to 67.3101671204516	Yes	****	<0.000000000000001
98.9247	34.4086	30.1075		siControl vs. sip63-2	72.0656	69.3310919795484 to 74.8000668871183	Yes	****	<0.000000000000001
97.5	37.5	27.5
102.5	35	30
98.4831	33.839	24.5041
101.517	35.2392	27.5379
LSCC H520	LSCC H520	LSCC H520
siControl	sip63-1	sip63-2		Tukey's multiple comparisons test	Mean Diff.	95.00% CI of diff.	Below threshold?	Summary	Adjusted P Value
98.3051	42.3729	30.5085		siControl vs. sip63-1	62.4274	57.8092922924673 to 67.0454535741993	Yes	****	<0.000000000000001
101.695	40	34.2373		siControl vs. sip63-2	67.8771	63.2589777258006 to 72.4951390075327	Yes	****	<0.000000000000001
96.5517	39.6552	31.0345
103.448	35.1724	29.3103
97.0588	35.8824	32.3529
102.941	32.3529	35.2941
CALU-1	CALU-1	CALU-1
siControl	sip63-1	sip63-2		Tukey's multiple comparisons test	Mean Diff.	95.00% CI of diff.	Below threshold?	Summary	Adjusted P Value
99.4652	44.9198	51.3369		siControl vs. sip63-1	55.4992	50.8102457567714 to 60.1882402098953	Yes	****	<0.000000000000001
100.535	43.8503	54.0107		siControl vs. sip63-2	49.1804	44.4913589567714 to 53.8693534098953	Yes	****	<0.000000000000001
98.4456	46.6321	55.9585
101.554	45.5959	53.886
97.629	43.7006	45.5602
102.371	42.3059	44.1655
LUDLU-1	LUDLU-1	LUDLU-1
siControl	sip63-1	sip63-2		Tukey's multiple comparisons test	Mean Diff.	95.00% CI of diff.	Below threshold?	Summary	Adjusted P Value
96.3855	30.1205	30.1205		siControl vs. sip63-1	69.0455	64.5543768400533 to 73.5366137932800	Yes	****	<0.000000000000001
103.614	28.6145	27.4096		siControl vs. sip63-2	69.6274	65.1363314567200 to 74.1185684099467	Yes	****	<0.000000000000001
98.7013	36.3636	31.1688
101.299	32.4675	33.7662
96.5517	30.5747	32.1839
103.448	27.5862	27.5862
