# Supplementary material for: USP28 deletion and small-molecule inhibition destabilizes c-MYC and elicits regression of squamous cell lung carcinoma
Source: eLife. 2021 Oct 12;10:e71596. doi: 10.7554/eLife.71596 (PMC8553340; doi:10.7554/eLife.71596)
Supplement: Figure 1—figure supplement 2—source data 1. [file elife-71596-fig1-figsupp2-data1.xlsx]

## Sheet: Fig2A
Figure 1 – figure supplement 2A
Deep Deletion	Shallow Deletion	Diploid	Gain		Number of families	1
8.2306	8.9313	9.44689	10.5266		Number of comparisons per family	3
8.15163	10.1354	10.3781	10.1766		Alpha	0.05
	9.09316	9.505	9.57586
	9.33261	9.91964	11.5316		Bonferroni's multiple comparisons test	Mean Diff.	95.00% CI of diff.	Below threshold?	Summary	Adjusted P Value	C-?
	9.26295	10.513	9.57649		Diploid vs. Deep Deletion	1.58686	0.655926537206884 to 2.51780255628905	Yes	***	0.000175107	A	Deep Deletion
	10.0851	10.1998	10.5669		Diploid vs. Shallow Deletion	0.500699	0.275846248204675 to 0.725552396579109	Yes	****	7.03519e-07	B	Shallow Deletion
	8.89257	9.8734	9.75855		Diploid vs. Gain	-0.380672	-0.636399918072391 to -0.124943783202818	Yes	**	0.00125141	D	Gain
	9.33723	10.223	10.9662
	9.43345	10.4739	9.7366		Test details	Mean 1	Mean 2	Mean Diff.	SE of diff.	n1	n2	t	DF
	9.0168	10.1547	10.2223		Diploid vs. Deep Deletion	9.77798	8.19111	1.58686	0.385107	81	2	4.12058	174
	9.00017	9.0361	9.6773		Diploid vs. Shallow Deletion	9.77798	9.27728	0.500699	0.0930165	81	57	5.38291	174
	9.38559	9.27103	10.2734		Diploid vs. Gain	9.77798	10.1586	-0.380672	0.105789	81	38	3.59842	174
	9.81422	10.072	9.28673
	9.52182	8.81897	9.68698
	8.88435	10.3434	9.23536
	9.29515	9.90477	9.46183
	10.1159	9.10558	10.8335
	9.26662	9.34481	9.32566
	9.72584	9.70485	9.72132
	10.017	9.98809	10.745
	10.0369	10.201	10.0222
	9.63837	10.0236	9.47121
	9.27194	10.5733	9.29218
	8.24232	9.6611	10.5891
	8.88761	10.6533	9.90393
	9.40717	10.1077	10.1223
	9.53466	9.99777	9.97273
	8.83329	10.4544	10.1667
	9.35849	9.56238	10.2707
	9.68367	9.08524	9.86923
	10.0434	9.15401	10.4025
	9.13346	8.76001	10.4733
	9.18484	9.48882	11.3841
	8.91091	10.0609	10.7411
	9.12085	10.8508	9.84914
	9.07961	10.1283	11.2147
	8.67488	8.75985	10.8812
	9.57514	9.73363	10.5172
	8.81324	9.01064
	9.92915	9.4334
	8.91704	9.89018
	8.99802	8.9323
	9.23903	9.30733
	9.29086	10.2668
	8.77744	9.75264
	8.71826	9.87286
	9.91711	9.58321
	9.85791	9.30701
	8.96176	9.7712
	9.33723	10.2216
	8.60065	9.10372
	9.94414	10.2341
	9.3732	9.21751
	8.70183	9.13606
	9.07004	10.014
	8.41749	9.81196
	8.77552	10.053
		9.42105
		9.65645
		10.5268
		10.1064
		8.62628
		9.67716
		9.3567
		11.004
		9.14101
		9.30177
		10.8875
		9.06305
		10.4398
		9.59979
		9.51138
		9.65118
		10.7042
		10.178
		10.5133
		9.64181
		10.31
		9.59502
		9.04771
		9.60298
