# Supplementary material for: USP28 deletion and small-molecule inhibition destabilizes c-MYC and elicits regression of squamous cell lung carcinoma
Source: eLife. 2021 Oct 12;10:e71596. doi: 10.7554/eLife.71596 (PMC8553340; doi:10.7554/eLife.71596)
Supplement: Figure 1—source data 1. [file elife-71596-fig1-data1.xlsx]

## Sheet: Fig1B
Figure 1B: MYC mRNA expression
Normal	LSCC		Column A	Normal
0.95	4.24		vs.	vs.
1.12	9.53		Column B	LSCC
1.14	2.57
0.79	15.19		Unpaired t test
0.99	9.41		P value	0.00829515
	10.72		P value summary	**
	26.47		Significantly different (P < 0.05)?	Yes
	15.47		One- or two-tailed P value?	Two-tailed
	14.97		t, df	t=2.929, df=20
	34.19
	35.49		How big is the difference?
	4.21		Mean of column A	0.998
	24.27		Mean of column B	14.97
	24.18		Difference between means (A - B) ± SEM	-13.97 ± 4.769
	4.14		95% confidence interval	-23.92 to -4.022
	13.4		R squared (eta squared)	0.3002
	6.01
			F test to compare variances
			F, DFn, Dfd	5446, 16, 4
			P value	1.517e-07
			P value summary	****
			Significantly different (P < 0.05)?	Yes
			Data analyzed
			Sample size, column A	5
			Sample size, column B	17

## Sheet: Fig1D
Figure 1D
Number of c-Myc+ cells / 10,000 um^2			Number of c-Jun+ cells / 10,000 um^2			Number of Dp63+ cells / 10,000 um^2
LADC	LSCC		LADC	LSCC		LADC	LSCC
4.375	27.3684		15.9341	39.2727		0	17.1131
12.2564	31.1029		16.0674	25.4		0	17.5
8.88889	27.4		6.71642	15.5422		0	18.7781
5.98592	23.7179		7.2	14.0876		0	34.1935
9.40299	29.6667		11	21.1111		0	26
2.24771	20.5263		11.5385	24.2857		0	19.4595
0.642648	7.98526		7.325	30.75		0	25.9058
5.42553	20.2222		14.7436	14.6341		0	31.5
4.25	13.7615		7.5	15.1961		0	65.5882
4.2	31.6788		9.4	19.6667		0	29.5
6.79688	15.4054		12.3	42.8571		0	50.5797
5.71429	15.2727		4.15	30.375		0	58.9744
7.29412	35.2273		29.625	32.5		0	53.3333
6.77778	14.3158		41.7778	28		0	59.9214
8.15217	14.5		27.3611	35		0	27.3077
8.57143	38.5714		5.29412	15		0	50.7547
4.03226	24.4444		10.8	10.75		0	41.875
6.11765	26.3636		8.93333	13.6842		0	24.375
5.4	31.6129		21.2121	34.6667		0	40.1429
6.22222	28.5484		22.2667	32.6		0	34.1176
6.65	32		17.4468	26.4348		0	16.7
6.5	27.7857		18.0469	29.434		0	19.7333
9.9	29.6		20.25	19.6413		0	10.2105
6.25	46.1818		19.6	45.75		0	24.2424
13.9	53.8983		25	36.25		0	47.6389
4.83333	28.9		33.1667	47.4286		0	44.8718
22.3077	40.8		24.8333	22.6506		0	32.4242
16.3333	30.8125		21	16.8333		0	31.4516
7.71429	44.3548		15.6	54.1237		0	58.6667
1	50		13.6667	45.5852		0	47.75
7.42857	55.6		13.3333	52.8		0	34.8193
6	60		27.4	36.4286		0	35.3846
5.4	51		5.42857	52.4096		0	42.7742
	60					0	24.7857
						0	31.6364
Column A	LADC		Column A	LADC		0	63.6667
vs.	vs.		vs.	vs.		0	31.3684
Column B	LSCC		Column B	LSCC		0	53.4416
						0	77.9412
Unpaired t test			Unpaired t test			0	65.1034
P value	1.7e-14		P value	7.37066e-06		0	78.0435
P value summary	****		P value summary	****
Significantly different (P < 0.05)?	Yes		Significantly different (P < 0.05)?	Yes		Column A	LADC
One- or two-tailed P value?	Two-tailed		One- or two-tailed P value?	Two-tailed		vs.	vs.
t, df	t=9.831, df=65		t, df	t=4.880, df=64		Column B	LSCC
How big is the difference?			How big is the difference?			Unpaired t test
Mean of column A	7.181		Mean of column A	16.54		P value	<0.000000000000001
Mean of column B	32.02		Mean of column B	29.73		P value summary	****
Difference between means (A - B) ± SEM	-24.84 ± 2.526		Difference between means (A - B) ± SEM	-13.19 ± 2.702		Significantly different (P < 0.05)?	Yes
95% confidence interval	-29.88 to -19.79		95% confidence interval	-18.59 to -7.790		One- or two-tailed P value?	Two-tailed
R squared (eta squared)	0.5979		R squared (eta squared)	0.2712		t, df	t=14.34, df=80
F test to compare variances			F test to compare variances			How big is the difference?
F, DFn, Dfd	10.92, 33, 32		F, DFn, Dfd	2.021, 32, 32		Mean of column A	0
P value	9.45583e-10		P value	0.05066		Mean of column B	39.01
P value summary	****		P value summary	ns		Difference between means (A - B) ± SEM	-39.01 ± 2.720
Significantly different (P < 0.05)?	Yes		Significantly different (P < 0.05)?	No		95% confidence interval	-44.43 to -33.60
						R squared (eta squared)	0.72
Data analyzed			Data analyzed
Sample size, column A	33		Sample size, column A	33		F test to compare variances
Sample size, column B	34		Sample size, column B	33		F, DFn, Dfd	Infinity, 40, 40
						P value	<0.000000000000001
						P value summary	****
						Significantly different (P < 0.05)?	Yes
						Data analyzed
						Sample size, column A	41
						Sample size, column B	41

## Sheet: Fig1E
Figure 1E: Cell number (% of control)
LSCC siControl	LSCC siMyc		Column A	LSCC siCtrl
100	48.4091		vs.	vs.
100	40.3893		Column B	LSCC siMyc
100	56.7857
			Unpaired t test
			P value	0.000406013
			P value summary	***
			Significantly different (P < 0.05)?	Yes
			One- or two-tailed P value?	Two-tailed
			t, df	t=10.8737183, df=4
			How big is the difference?
			Mean of column A	100
			Mean of column B	48.528
			Difference between means (A - B) ± SEM	51.4719668 ± 4.73361232
			95% confidence interval	38.3293520 to 64.6145816
			R squared (eta squared)	0.967277
			F test to compare variances
			F, DFn, Dfd	Infinity, 2, 2
			P value	<0.000000000000001
			P value summary	****
			Significantly different (P < 0.05)?	Yes
			Data analyzed
			Sample size, column A	3
			Sample size, column B	3

## Sheet: Fig1G
Figure 1G: USP28 mRNA expression
Normal	LSCC		Column A	Normal
1.23	2.25		vs.	vs.
1.1	3.58		Column B	LSCC
0.88	4.25
0.87	1.9		Unpaired t test
0.92	7.89		P value	0.00226088
	5.69		P value summary	**
	5.8		Significantly different (P < 0.05)?	Yes
	9.1		One- or two-tailed P value?	Two-tailed
	9.44		t, df	t=3.499, df=20
	4.68
	5.4		How big is the difference?
	3.11		Mean of column A	1
	4.8		Mean of column B	4.873
	7.38		Difference between means (A - B) ± SEM	-3.873 ± 1.107
	2		95% confidence interval	-6.182 to -1.564
	3.4		R squared (eta squared)	0.3797
	2.17
			F test to compare variances
			F, DFn, Dfd	235.0, 16, 4
			P value	8.0888e-05
			P value summary	****
			Significantly different (P < 0.05)?	Yes
			Data analyzed
			Sample size, column A	5
			Sample size, column B	17

## Sheet: Fig1I
Figure 1I: Cell number (% of control)
LSCC shControl	LSCC shUsp28_1	LSCC shUsp28_2		Number of comparisons per family	2
100	50.9434	60.3774		Alpha	0.05
100	44.2553	35.1064
100	56	52.2667		Dunnett's multiple comparisons test	Mean Diff.	95.00% CI of diff.	Significant?	Summary	Adjusted P Value	A-?
				LSCC shCtrl vs. LSCC shUsp28_1	49.6	30.46 to 68.74	Yes	***	0.000580556	B	LSCC shUsp28_1
				LSCC shCtrl vs. LSCC shUsp28_2	50.75	31.61 to 69.89	Yes	***	0.000512858	C	LSCC shUsp28_2
				Test details	Mean 1	Mean 2	Mean Diff.	SE of diff.	n1	n2	q	DF
				LSCC shCtrl vs. LSCC shUsp28_1	100	50.4	49.6	6.686	3	3	7.418	6
				LSCC shCtrl vs. LSCC shUsp28_2	100	49.25	50.75	6.686	3	3	7.59	6
