# Supplementary material for: USP28 deletion and small-molecule inhibition destabilizes c-MYC and elicits regression of squamous cell lung carcinoma
Source: eLife. 2021 Oct 12;10:e71596. doi: 10.7554/eLife.71596 (PMC8553340; doi:10.7554/eLife.71596)
Supplement: Figure 2—figure supplement 1—source data 1. [file elife-71596-fig2-figsupp1-data1.xlsx]

## Sheet: 1E
Figure 2 – figure supplement 1E: % body weight
	Day		Vehicle	Vehicle	Vehicle	Vehicle	Vehicle	Vehicle	Vehicle	Vehicle		Tam	Tam	Tam	Tam	Tam	Tam	Tam		Tam+FT	Tam+FT	Tam+FT	Tam+FT	Tam+FT	Tam+FT	Tam+FT
	1		100	100	100	100	100	100	100	100		100	100	100	100	100	100	100		100	100	100	100	100	100	100
	2		100	100	100.433	100.45	100.877	100	97.8261	100.599		99.5305	100.452	99.5392	99.5261	100.358	100.699	100		100	100.909	99.1416	99.537	99.0698	100.952	100.417
	3		99.5556	99.0909	100	99.5495	101.754	100	98.6957	101.198		99.061	99.5475	100	100.474	100.717	100.35	100		100.426	101.364	98.7124	99.537	99.5349	100	100.833
	4		100.444	99.0909	99.5671	99.0991	100.877	98.2979	98.2609	101.497		97.6526	99.5475	99.0783	99.5261	100	99.6503	98.6711		99.1489	100.455	97.8541	98.6111	98.6047	99.5238	100
	5		100.444	98.6364	99.1342	99.0991	100.439	97.8723	97.8261	102.096		97.1831	99.095	98.1567	97.6303	98.5663	98.6014	98.3389		98.7234	99.0909	97.4249	97.6852	97.6744	99.5238	99.1667
	8		100.889	100	99.5671	100	100	98.2979	98.2609	101.497		98.1221	99.5475	99.0783	98.5782	98.5663	98.2517	99.0033		98.2979	99.0909	98.2833	99.0741	98.6047	100	99.1667
	9		100.889	100.455	98.7013	100	99.5614	97.4468	97.8261	102.096		97.6526	98.19	97.6959	98.5782	97.8495	97.9021	98.3389		97.8723	98.6364	97.8541	98.1481	97.6744	98.5714	97.9167
	10		100.889	100.455	97.8355	99.0991	99.5614	96.5957	96.9565	102.395		97.1831	97.7376	96.7742	97.6303	96.7742	97.9021	97.6744		97.0213	96.8182	98.2833	97.2222	97.6744	97.619	96.25
	11		101.333	101.364	97.4026	100	100.877	96.1702	96.5217	102.395		96.2441	96.3801	95.8525	97.1564	95.6989	96.5035	96.3455		95.3191	95.4545	96.5665	96.2963	96.7442	96.6667	95
	12		102.222	101.364	97.4026	99.5495	101.754	95.7447	95.6522	102.395		94.3662	94.1176	93.5484	93.3649	93.19	96.1538	95.3488		93.617	93.1818	94.4206	93.9815	95.3488	94.2857	93.75
	16		104.444	102.273	97.4026	99.0991	102.193	95.7447	97.3913	102.395		96.2441	95.4751	94.9309	95.7346	95.3405	95.8042	96.3455		95.7447	95	94.4206	94.9074	94.8837	94.7619	95.8333
	18		104.444	102.273	97.4026	98.1982	102.193	96.1702	98.2609	101.796		97.1831	97.2851	95.3917	95.7346	96.7742	95.8042	96.6777		96.1702	95.9091	94.4206	95.3704	95.3488	95.2381	96.25
	22		104.444	103.636	98.7013	99.0991	100	96.1702	101.304	101.796		98.5915	99.5475	96.3134	96.6825	97.8495	96.5035	98.3389		100	95.4545	94.4206	97.2222	95.3488	95.2381	98.75
	24		104.444	104.545	99.5671	100.45	101.316	96.1702	101.304	101.796		98.5915	100.452	96.7742	97.1564	98.9247	95.4545	98.0066		100.426	94.0909	94.4206	98.1481	93.0233	95.7143	99.1667
	26		104.889	103.636	98.7013	99.0991	102.193	95.7447	101.304	102.695		99.5305	100.905	96.7742	97.1564	99.2832	94.7552	98.3389		100.851	93.6364	94.4206	98.1481	92.5581	95.2381	100.417
	29		104	102.727	98.7013	100	103.07	96.1702	102.174	102.695		100	102.715	99.0783	98.5782	100.358	96.1538	96.6777		102.128	94.0909	94.8498	98.6111	93.9535	95.2381	102.083
	31		104	102.727	98.7013	99.5495	103.07	95.7447	100.87	102.695		100	102.715	100.461	98.5782	100.717	95.4545	97.01		102.128	94.0909	95.7082	99.537	93.0233	94.2857	101.25
	33		103.556	102.273	98.2684	99.0991	102.632	94.8936	100.435	102.695		100.939	103.167	99.0783	99.0521	100.358	95.8042	97.3422		102.553	93.6364	95.279	99.537	93.0233	95.2381	100.833
	36		102.222	102.273	98.2684	100.45	103.947	94.8936	100.435	103.293		101.408	105.43	98.1567	100.474	100.717	95.1049	97.3422		103.83	93.1818	94.4206	101.389	93.0233	96.1905	101.25
	38		102.222	102.273	97.4026	100.45	103.947	95.3191	99.5652	103.593		100.939	105.882	97.6959	100	100.717	94.4056	98.0066		104.255	93.1818	93.5622	101.852	93.9535	97.1429	102.083
	40		101.333	102.727	96.9697	101.351	104.825	94.8936	99.5652	103.293		100.939	105.882	98.1567	100.474	101.434	94.4056	98.0066		104.681	93.1818	92.2747	102.778	93.9535	98.0952	100.833
	44		100.889	103.182	96.9697	101.351	105.263	95.3191	99.5652	103.293		101.408	105.882	98.6175	100.474	100.358	95.1049	98.3389		104.255	94.0909	92.7039	102.778	93.9535	98.5714	101.667
Number of families	22
Number of comparisons per family	3
Alpha	0.05
Tukey's multiple comparisons test	Mean Diff.	95.00% CI of diff.	Below threshold?	Summary	Adjusted P Value
1
Vehicle vs. Tam	0
Vehicle vs. Tam+FT	0
Tam vs. Tam+FT	0
2
Vehicle vs. Tam	0.00804096	-1.02816674840390 to 1.04424866268960	No	ns	0.999757
Vehicle vs. Tam+FT	0.0193827	-1.16189608542874 to 1.20066142828589	No	ns	0.998965
Tam vs. Tam+FT	0.0113417	-0.951565184782520 to 0.974248613353961	No	ns	0.999428
3
Vehicle vs. Tam	-0.0408249	-1.18154860082719 to 1.09989889368432	No	ns	0.994885
Vehicle vs. Tam+FT	-0.0776668	-1.39018091875519 to 1.23484724018376	No	ns	0.986645
Tam vs. Tam+FT	-0.036842	-1.13220254629675 to 1.05851857486820	No	ns	0.995352
4
Vehicle vs. Tam	0.480962	-0.893203079879863 to 1.85512714059413	No	ns	0.631418
Vehicle vs. Tam+FT	0.470793	-0.959962986940920 to 1.90154893336949	No	ns	0.667432
Tam vs. Tam+FT	-0.0101691	-1.21831738979301 to 1.19797927550732	No	ns	0.999721
5
Vehicle vs. Tam	1.21884	-0.350661842506593 to 2.78833551393516	No	ns	0.133075
Vehicle vs. Tam+FT	0.973469	-0.663246220507597 to 2.61018449193616	No	ns	0.286145
Tam vs. Tam+FT	-0.245368	-1.33488201434344 to 0.844146614343438	No	ns	0.819169
8
Vehicle vs. Tam	1.07861	-0.130753653602373 to 2.28797466431667	No	ns	0.0808668
Vehicle vs. Tam+FT	0.882905	-0.355442833803940 to 2.12125261594678	No	ns	0.177384
Tam vs. Tam+FT	-0.195706	-0.989208757705536 to 0.597797529134080	No	ns	0.790036
9
Vehicle vs. Tam	1.59227	-0.0528501206042675 to 3.23738584560426	No	ns	0.0571569
Vehicle vs. Tam+FT	1.52565	-0.120865192321715 to 3.17216274589312	No	ns	0.0679935
Tam vs. Tam+FT	-0.0666191	-0.581776857441870 to 0.448538686013283	No	ns	0.936749
10
Vehicle vs. Tam	1.84109	-0.265636174030927 to 3.94782373117379	No	ns	0.0847206
Vehicle vs. Tam+FT	1.95359	-0.169850351945353 to 4.07703273765962	No	ns	0.0705389
Tam vs. Tam+FT	0.112497	-0.717042382005816 to 0.942037210577213	No	ns	0.92887
11
Vehicle vs. Tam	3.19641	0.649440535096656 to 5.74337096133195	Yes	*	0.0178112
Vehicle vs. Tam+FT	3.50122	0.938030797494877 to 6.06441609893370	Yes	*	0.0108481
Tam vs. Tam+FT	0.304818	-0.589377980544679 to 1.19901338054465	No	ns	0.634479
12
Vehicle vs. Tam	5.21201	2.16541493471733 to 8.25861101885410	Yes	**	0.00249763
Vehicle vs. Tam+FT	5.42692	2.42615303190110 to 8.42768277881321	Yes	**	0.00220606
Tam vs. Tam+FT	0.214905	-1.12973854861130 to 1.55954840575418	No	ns	0.901048
16
Vehicle vs. Tam	4.42146	1.17692529494897 to 7.66599873719389	Yes	*	0.0119077
Vehicle vs. Tam+FT	5.03907	1.79406870305816 to 8.28407870051326	Yes	**	0.00589256
Tam vs. Tam+FT	0.617612	-0.109226228413878 to 1.34444959984244	No	ns	0.0997429
18
Vehicle vs. Tam	3.68508	0.606651270262517 to 6.76350137259462	Yes	*	0.022013
Vehicle vs. Tam+FT	4.5627	1.49102978097406 to 7.63437760474022	Yes	**	0.00724923
Tam vs. Tam+FT	0.877627	-0.123854443150619 to 1.87910918600777	No	ns	0.0882297
22
Vehicle vs. Tam	2.95449	0.0289302287315576 to 5.88005074269702	Yes	*	0.0478299
Vehicle vs. Tam+FT	4.01055	0.723469157485181 to 7.29763109965767	Yes	*	0.0172041
Tam vs. Tam+FT	1.05606	-1.46112152669118 to 3.57324081240545	No	ns	0.504724
24
Vehicle vs. Tam	3.29063	0.259620001375098 to 6.32163103433920	Yes	*	0.0334472
Vehicle vs. Tam+FT	4.77222	0.976103134663227 to 8.56833441533677	Yes	*	0.0144622
Tam vs. Tam+FT	1.48159	-1.92433172756505 to 4.88751824185074	No	ns	0.480038
26
Vehicle vs. Tam	2.92659	-0.563282918513517 to 6.41646415065639	No	ns	0.105252
Vehicle vs. Tam+FT	4.56577	0.184966967325393 to 8.94657883624602	Yes	*	0.0409459
Tam vs. Tam+FT	1.63918	-2.41645794962453 to 5.69482252105307	No	ns	0.530681
29
Vehicle vs. Tam	2.11197	-1.23953955112171 to 5.46348694040742	No	ns	0.255469
Vehicle vs. Tam+FT	3.91299	-0.601863539282301 to 8.42783949999656	No	ns	0.0913822
Tam vs. Tam+FT	1.80101	-2.63506390602664 to 6.23709247745518	No	ns	0.527969
31
Vehicle vs. Tam	1.64317	-1.92377038393056 to 5.21011054464483	No	ns	0.464771
Vehicle vs. Tam+FT	3.77354	-0.877325508825350 to 8.42440501239679	No	ns	0.116762
Tam vs. Tam+FT	2.13037	-2.47780638659246 to 6.73854572944962	No	ns	0.446411
33
Vehicle vs. Tam	1.08963	-2.55640786372514 to 4.73566526372512	No	ns	0.715859
Vehicle vs. Tam+FT	3.32412	-1.40999645365990 to 8.05823316794560	No	ns	0.186676
Tam vs. Tam+FT	2.23449	-2.38055576778605 to 6.84953508207177	No	ns	0.414529
36
Vehicle vs. Tam	0.918177	-3.44260072581854 to 5.27895535796139	No	ns	0.843125
Vehicle vs. Tam+FT	3.11075	-2.30767761921912 to 8.52918587993339	No	ns	0.302127
Tam vs. Tam+FT	2.19258	-3.47434866082688 to 7.85950228939831	No	ns	0.566214
38
Vehicle vs. Tam	0.932817	-3.66088461857070 to 5.52651867928501	No	ns	0.852379
Vehicle vs. Tam+FT	2.59215	-3.06224121602065 to 8.24654896244922	No	ns	0.450009
Tam vs. Tam+FT	1.65934	-4.31216954725708 to 7.63084323297134	No	ns	0.740638
40
Vehicle vs. Tam	0.720113	-4.03188400611978 to 5.47210906326265	No	ns	0.915214
Vehicle vs. Tam+FT	2.64878	-3.39504909093372 to 8.69261189093372	No	ns	0.481148
Tam vs. Tam+FT	1.92867	-4.32091733024336 to 8.17825507310050	No	ns	0.690302
44
Vehicle vs. Tam	0.702738	-3.84960050833373 to 5.25507701190514	No	ns	0.912742
Vehicle vs. Tam+FT	2.44059	-3.38740439400802 to 8.26859095472232	No	ns	0.513314
Tam vs. Tam+FT	1.73786	-4.18497490860397 to 7.66068496574687	No	ns	0.713501
Test details	Mean 1	Mean 2	Mean Diff.	SE of diff.	N1	N2	q	DF
1
Vehicle vs. Tam	100	100	0	0	8	7
Vehicle vs. Tam+FT	100	100	0	0	8	7
Tam vs. Tam+FT	100	100	0	0	7	7
2
Vehicle vs. Tam	100.023	100.015	0.00804096	0.382908	8	7	0.0296981	10.8564
Vehicle vs. Tam+FT	100.023	100.004	0.0193827	0.447304	8	7	0.061281	12.9822
Tam vs. Tam+FT	100.015	100.004	0.0113417	0.351916	7	7	0.045578	10.115
3
Vehicle vs. Tam	99.9805	100.021	-0.0408249	0.423194	8	7	0.136427	11.1494
Vehicle vs. Tam+FT	99.9805	100.058	-0.0776668	0.497082	8	7	0.220965	13
Tam vs. Tam+FT	100.021	100.058	-0.036842	0.400708	7	7	0.130026	10.1752
4
Vehicle vs. Tam	99.6418	99.1608	0.480962	0.51628	8	7	1.31747	12.2109
Vehicle vs. Tam+FT	99.6418	99.171	0.470793	0.54061	8	7	1.23157	12.7612
Tam vs. Tam+FT	99.1608	99.171	-0.0101691	0.451885	7	7	0.0318249	11.8127
5
Vehicle vs. Tam	99.4434	98.2245	1.21884	0.571231	8	7	3.01751	9.86264
Vehicle vs. Tam+FT	99.4434	98.4699	0.973469	0.609832	8	7	2.2575	11.4905
Tam vs. Tam+FT	98.2245	98.4699	-0.245368	0.404106	7	7	0.858692	11.1323
8
Vehicle vs. Tam	99.814	98.7354	1.07861	0.440777	8	7	3.46067	9.94666
Vehicle vs. Tam+FT	99.814	98.9311	0.882905	0.458229	8	7	2.72488	10.9559
Tam vs. Tam+FT	98.7354	98.9311	-0.195706	0.296149	7	7	0.934562	11.6279
9
Vehicle vs. Tam	99.6219	98.0296	1.59227	0.572198	8	7	3.93536	7.77233
Vehicle vs. Tam+FT	99.6219	98.0962	1.52565	0.574577	8	7	3.7551	7.89273
Tam vs. Tam+FT	98.0296	98.0962	-0.0666191	0.192958	7	7	0.48826	11.9359
10
Vehicle vs. Tam	99.2234	97.3823	1.84109	0.734514	8	7	3.54479	7.85942
Vehicle vs. Tam+FT	99.2234	97.2698	1.95359	0.755262	8	7	3.65806	8.67255
Tam vs. Tam+FT	97.3823	97.2698	0.112497	0.306411	7	7	0.519222	10.8265
11
Vehicle vs. Tam	99.508	96.3116	3.19641	0.881509	8	7	5.12802	7.59924
Vehicle vs. Tam+FT	99.508	96.0068	3.50122	0.905765	8	7	5.46663	8.3888
Tam vs. Tam+FT	96.3116	96.0068	0.304818	0.327864	7	7	1.31481	10.3213
12
Vehicle vs. Tam	99.5106	94.2985	5.21201	1.09641	8	7	6.72277	9.23976
Vehicle vs. Tam+FT	99.5106	94.0836	5.42692	1.04825	8	7	7.32157	7.93125
Tam vs. Tam+FT	94.2985	94.0836	0.214905	0.491687	7	7	0.61812	10.1478
16
Vehicle vs. Tam	100.118	95.6964	4.42146	1.11659	8	7	5.59999	7.41033
Vehicle vs. Tam+FT	100.118	95.0788	5.03907	1.11791	8	7	6.37468	7.44415
Tam vs. Tam+FT	95.6964	95.0788	0.617612	0.272384	7	7	3.20663	11.9811
18
Vehicle vs. Tam	100.092	96.4072	3.68508	1.07854	8	7	4.83199	8.0428
Vehicle vs. Tam+FT	100.092	95.5296	4.5627	1.06765	8	7	6.04378	7.74797
Tam vs. Tam+FT	96.4072	95.5296	0.877627	0.373976	7	7	3.3188	11.674
22
Vehicle vs. Tam	100.644	97.6895	2.95449	1.06728	8	7	3.91489	10.0035
Vehicle vs. Tam+FT	100.644	96.6335	4.01055	1.24267	8	7	4.56417	12.8145
Tam vs. Tam+FT	97.6895	96.6335	1.05606	0.913803	7	7	1.63437	9.71341
24
Vehicle vs. Tam	101.199	97.9087	3.29063	1.13204	8	7	4.11083	11.6888
Vehicle vs. Tam+FT	101.199	96.4271	4.77222	1.43097	8	7	4.71635	12.5261
Tam vs. Tam+FT	97.9087	96.4271	1.48159	1.23334	7	7	1.69887	9.57186
26
Vehicle vs. Tam	101.033	98.1062	2.92659	1.31324	8	7	3.15162	12.3589
Vehicle vs. Tam+FT	101.033	96.467	4.56577	1.64651	8	7	3.92161	12.2461
Tam vs. Tam+FT	98.1062	96.467	1.63918	1.47876	7	7	1.56764	9.97105
29
Vehicle vs. Tam	101.192	99.0802	2.11197	1.26918	8	7	2.35332	12.9898
Vehicle vs. Tam+FT	101.192	97.2792	3.91299	1.66926	8	7	3.31511	10.8955
Tam vs. Tam+FT	99.0802	97.2792	1.80101	1.61786	7	7	1.57432	9.98557
31
Vehicle vs. Tam	100.92	99.2765	1.64317	1.35084	8	7	1.72026	12.9958
Vehicle vs. Tam+FT	100.92	97.1461	3.77354	1.72199	8	7	3.09909	10.9997
Tam vs. Tam+FT	99.2765	97.1461	2.13037	1.69039	7	7	1.78231	10.351
33
Vehicle vs. Tam	100.481	99.3917	1.08963	1.38039	8	7	1.11633	12.9652
Vehicle vs. Tam+FT	100.481	97.1572	3.32412	1.76035	8	7	2.67049	11.3287
Tam vs. Tam+FT	99.3917	97.1572	2.23449	1.68932	7	7	1.8706	10.2139
36
Vehicle vs. Tam	100.723	99.8047	0.918177	1.63827	8	7	0.792603	12.2057
Vehicle vs. Tam+FT	100.723	97.6121	3.11075	1.98454	8	7	2.21677	10.2507
Tam vs. Tam+FT	99.8047	97.6121	2.19258	2.10109	7	7	1.47579	11.1034
38
Vehicle vs. Tam	100.597	99.6638	0.932817	1.7209	8	7	0.766578	11.9502
Vehicle vs. Tam+FT	100.597	98.0044	2.59215	2.0659	8	7	1.77446	10.0961
Tam vs. Tam+FT	99.6638	98.0044	1.65934	2.21705	7	7	1.05846	11.2082
40
Vehicle vs. Tam	100.62	99.8997	0.720113	1.78963	8	7	0.569054	12.4362
Vehicle vs. Tam+FT	100.62	97.971	2.64878	2.21475	8	7	1.69136	10.2842
Tam vs. Tam+FT	99.8997	97.971	1.92867	2.31055	7	7	1.18048	10.8925
44
Vehicle vs. Tam	100.729	100.026	0.702738	1.72036	8	7	0.577683	12.7765
Vehicle vs. Tam+FT	100.729	98.2885	2.44059	2.14691	8	7	1.60767	10.6357
Tam vs. Tam+FT	100.026	98.2885	1.73786	2.18444	7	7	1.12509	10.719
