# Supplementary material for: USP28 deletion and small-molecule inhibition destabilizes c-MYC and elicits regression of squamous cell lung carcinoma
Source: eLife. 2021 Oct 12;10:e71596. doi: 10.7554/eLife.71596 (PMC8553340; doi:10.7554/eLife.71596)
Supplement: Figure 2—source data 1. [file elife-71596-fig2-data1.xlsx]

## Sheet: Fig2C
Figure 2C: Number of LADC tumors per mouse
Vehicle	Tam	Tam+FT		Number of families	1
82	57	82		Number of comparisons per family	3
46	40	75		Alpha	0.05
53	99	51
61	75	74		Tukey's multiple comparisons test	Mean Diff.	95.00% CI of diff.	Below threshold?	Summary	Adjusted P Value
81	94	80		Vehicle vs. Tam	3.286	-23.65 to 30.22	No	ns	0.94857	A-B
91	47	93		Vehicle vs. Tam + FT	-3.143	-30.08 to 23.79	No	ns	0.952828	A-C
96	97	99		Tam vs. Tam + FT	-6.429	-34.24 to 21.39	No	ns	0.828588	B-C
98
				Test details	Mean 1	Mean 2	Mean Diff.	SE of diff.	n1	n2	q	DF
				Vehicle vs. Tam	76	72.71	3.286	10.6	8	7	0.4383	19
				Vehicle vs. Tam + FT	76	79.14	-3.143	10.6	8	7	0.4193	19
				Tam vs. Tam + FT	72.71	79.14	-6.429	10.95	7	7	0.8303	19

## Sheet: Fig2D
Figure 2D: Size of LADC tumors (um^2)
Vehicle	Tam	Tam + FT		Number of families	1
470093	34828	88148		Number of comparisons per family	3
152670	109964	114790		Alpha	0.05
263152	63827	151077
179662	45065	265672		Tukey's multiple comparisons test	Mean Diff.	95.00% CI of diff.	Below threshold?	Summary	Adjusted P Value
129635	94180	41634		Vehicle vs. Tam	91891	70282 to 113501	Yes	****	<0.000000000000001	A-B
42880	126995	60223		Vehicle vs. Tam + FT	95046	74218 to 115874	Yes	****	<0.000000000000001	A-C
390857	148079	230041		Tam vs. Tam + FT	3155	-18068 to 24378	No	ns	0.935158	B-C
27242	57605	201557
239631	65620	99229		Test details	Mean 1	Mean 2	Mean Diff.	SE of diff.	n1	n2	q	DF
265654	122281	55073		Vehicle vs. Tam	193392	101501	91891	9210	466	434	14.11	1400
140898	100176	87498		Vehicle vs. Tam + FT	193392	98346	95046	8877	466	503	15.14	1400
143781	74125	89017		Tam vs. Tam + FT	101501	98346	3155	9046	434	503	0.4932	1400
638184	70941	55343
280719	145460	86039
316896	68739	70778
230369	188095	72172
280641	59080	113030
226968	135656	110953
503179	182708	35031
258424	129595	52199
148548	152066	55789
139730	256607	61476
267057	186315	92712
62843	199127	59065
274707	184035	35970
194038	48285	139606
114199	156523	87694
112041	185845	70497
103553	50866	86691
113498	120222	145643
31211	52937	300376
128072	140480	88436
72737	106417	65623
34104	109747	115326
88568	123982	153589
95483	96018	74549
453296	93272	81114
191749	62485	97889
147109	112980	53382
165948	57749	140512
267843	206135	213873
568669	101840	62147
573036	133426	57777
230435	196516	469381
500471	225311	152182
96760	75036	80568
175994	211118	55104
184110	203847	71449
232333	181215	71472
335567	50818	83515
669155	184252	60098
277260	198072	45545
149257	107117	57102
276312	133913	17028
100456	124853	51198
63928	152187	76854
246061	46184	67720
191595	122652	60051
108710	36407	89611
144154	68684	132686
239726	78703	126490
118741	40328	193601
196400	71499	43268
407677	137850	55088
124952	90161	50240
217656	114592	55330
73729	364591	41950
291652	123822	98597
132587	44663	58054
357664	77675	44079
241031	242982	87439
94758	136846	34729
130905	54096	69017
65631	93691	98910
99260	129531	74849
67192	291027	53248
316785	216725	105832
213514	25715	93591
102711	40150	57881
137342	102713	84188
50160	66374	53003
59893	88538	73564
205393	125753	69833
203947	49779	33304
167896	85524	139282
232888	134949	71160
144553	120669	80902
91234	65451	55074
101304	39889	74787
126945	191000	52095
285736	161394	118776
548534	54740	126098
123800	111655	94491
359213	140921	66916
79850	48213	38731
131254	50395	81128
238228	85482	40175
454910	74118	67585
408226	250797	96512
294281	180550	130229
63838	80631	74420
73430	113922	78381
212334	105555	138762
402862	263019	87468
273456	84247	155050
285560	138814	91150
204269	51370	57108
206830	49164	50173
1451822	90973	69613
115387	99990	51144
171086	102318	75296
241529	110603	72633
77807	125414	56868
172607	224712	120573
187920	35484	139084
296992	48936	210761
123737	50687	81883
352603	20713	74720
384047	49626	100200
127627	107061	76291
149554	39152	81659
99508	29835	108480
64125	135525	218809
176231	54484	66358
101708	34218	85927
88596	227903	116520
99427	93944	132738
166308	59434	103714
169279	23019	110918
155036	145867	148900
121057	24082	194291
53300	93426	92253
332004	29140	88790
139766	29976	81384
243273	147298	163456
56784	122961	124769
67448	75354	241077
69647	181061	122998
88265	103021	181556
60023	92112	214985
129779	82203	150589
113775	68957	128214
125901	30935	119761
50990	45425	136285
81882	62199	107217
64777	30616	83352
177653	74289	82757
69956	156006	113849
118894	64762	271811
125119	76930	245777
54452	117069	189415
60124	63049	99324
79184	45515	89563
84400	28382	53124
292786	140909	136017
383608	86896	142222
140657	118170	185341
78608	60400	1454.7
68960	37707	1192.4
72444	50745	1164.5
60509	169055	1034
52288	132852	1903.9
79295	73197	1673.9
86644	143953	54699.2
36111	198743	112334
49376	115724	78318.6
90221	302656	116454
70168	62766	20624.8
46660	95877	22244.8
39810	64172	48092
47769	161730	53350.1
52127	262629	119141
92340	51335	41736
66489	247993	70266.6
159506	648057	45915.1
97437	417181	56192.3
79824	147558	71713.1
99847	437270	55851.4
235899	165233	150974
192052	121277	32572.1
138187	81256	52789.9
47059.1	110464	91988.5
241266	120861	73065.8
72844.6	532645	67119.2
111296	407077	44250
46481.4	91838	62537.7
222869	70575	61673.7
37549.3	100175	76980.9
117184	60645	25225.2
55189.7	55928	83306.9
77029.1	106884	71159.9
40179.2	211549	24773.9
62664.2	101020	15333.5
35960	117480	41663.2
77267.6	109425	70866.1
41374.5	52229	59215.5
87699.2	50221.8	36397.8
37922.3	177919	128180
13478.4	103450	174702
112976	166274	41367.6
35689.3	71105.3	96143.6
174679	277930	34330.6
49135.9	213384	115498
49467.6	66113.5	66945.1
157630	90852	105362
176592	44504.8	36060.2
102402	127770	107190
66032.6	177787	336148
62237.8	74793.7	28276.3
48287.2	84367.8	43921.1
124031	70355.5	53263.7
153404	70590.8	105108
73475.8	45460.6	128719
82288.9	61467	23828.8
131975	60615.8	27494.2
69870	73491.1	76477.4
73402.4	32293.9	88936.1
83486.8	184894	189722
202692	49881.1	95740.3
84012.9	177312	116655
240956	83796.5	174931
657739	36693.6	41632.6
188598	38786.5	140813
73529.7	133144	52452.4
119055	75878.7	133509
1.13397e+06	68243	109141
102423	43040.4	122723
193264	107510	136019
125312	86038.5	51949.4
67981.3	48687.6	96973.6
450268	42186.1	63308
702722	62733.8	23621.3
76087.7	65553.7	122168
74155	63423.4	72261.5
148287	210281	68441.1
92599.8	35166.1	74569.5
166096	450574	92966.1
209841	94222.9	38824.5
141215	62957.5	83750.8
117940	176084	183020
216021	56230.1	56433.5
43596.8	104619	177946
68719	50740.7	76431
74893	77996.1	47470.1
85256.8	79264.4	135248
49728	101538	110229
77460.7	56253.3	188378
1.01674e+06	147726	57880.7
78792.4	104915	229077
147182	131014	43549.5
163678	40982.4	35221.4
54276.7	63083.2	90992.9
266227	24122.1	99206.7
55991.2	133187	119794
226007	13022.7	42351.1
684118	58829.5	105086
70688.2	29065.1	57908.1
69735.2	247128	41078.6
45470.4	46545.3	38233.3
59299.3	125017	57733.2
786497	52301.3	35463.4
158880	89366.4	49325.8
72420.7	128089	95628.4
96341.9	36271.2	52755.4
54674.6	86486.3	53562.6
92465.7	297536	70961.8
198465	74635.3	58271.4
62304.5	154425	266880
212502	106754	73481.9
697086	31419	49225.5
598885	250384	145360
65217.3	112889	75348.9
125275	191307	17967.8
89099.3	43734.7	55709
59949.3	74685.1	45345.4
29207.3	74156.6	92583.6
178178	68776.4	62246.7
461962	275155	104649
39757.3	81292.6	76009.9
44655.5	92812.6	103411
85776.8	86020.1	172900
70766.3	78944.3	108521
163233	73612.8	54030.6
61154.3	162287	114628
240104	113618	25125.2
215502	217554	106163
85501.6	124311	66834
39343.5	92490.1	87933.3
97229	26124.8	38156.5
172453	115883	49048.6
166437	80780.1	85840.6
77255.2	104747	209792
70606.7	61132.1	49435.5
181758	62683	44426.8
43573.6	284408	44672.2
82846.9	168527	73038
104799	67728.3	31478.1
155113	59535	81037.7
35410.5	322970	83013
196052	48031.7	52950.6
162010	92479.9	105036
205827	64310.3	112665
99181.6	81469.2	101015
133489	106727	48409.9
206934	66441.8	152394
88462.9	31593.3	65142
73240.3	129621	51682
194434	283434	120708
109576	55215.7	92176.9
146849	76293.9	131369
332034	79870.4	102899
89798.4	52665.5	60690.7
128737	124982	60611.9
837628	191265	23232.3
103793	58607.1	82832
80419.2	84907.6	233080
132825	152670	67365
80960.6	144636	97768.7
40229.2	53298.3	169489
161307	44635.4	48033.2
48665.6	81271.3	104814
521145	77811.7	114528
134019	159809	189082
44290.6	296749	18228.2
151223	31209.4	278157
1.14909e+06	60347.2	25580.9
31525.4	52874.6	255658
46269.9	82082.1	89104.7
205866	24279.6	89036.2
39818	107722	80737.2
39082.7	68752.9	122542
82379	70841.5	43566.2
16182.3	63508.3	56726.5
31806.9	73100.6	75408.7
68462.4	42834.4	27116.4
30909.3	117561	102536
32141	76939.5	41153.6
331705	119056	50986.3
41399.8	15216.4	209400
23644.8	30895.6	40136.6
38930.4	167752	62713.6
120017	83469.3	123732
141256	32310.8	66958.4
19883.3	92381.1	79175.5
177420	92492.1	54078.8
119468	23146.5	33328
49928.9	57607.8	92473.9
30580	93996.5	38671.9
50477.4	68085.3	83119.9
101400	11322.8	54248.8
163515	47444.8	61741
100211	82829.2	30081.9
586051	23769.7	67186.3
223443	71886.1	48262.9
69509.4	38196.6	41170.4
130569	90570.2	22334.8
275052	50732.4	13007.2
95599.3	165287	40178.9
173417	74636	24752.2
196380	50665.4	66053.9
322194	66265	95306.3
67804.5	55505.9	32839.8
46117.1	73959.8	45400.8
100247	37917.6	39509.4
75652.8	83921.8	63938.3
140712	77478	48174.4
83339.5	38787.2	146795
194881	74849.9	244761
57226.6	36371.5	32306.2
51762.4	35798.6	197278
28147.7	64917.4	47308
128131	139406	66065.7
164176	88041.5	94001.2
118748	21960.2	99309.1
47427.2	166709	38283.4
85253	44068.6	73405.2
38277.5	71257.1	57878.9
377577	90248.5	58300.4
430433	51669.5	52881.9
42419.6	16609.3	60073.1
660601	114190	58802.1
56174.4	93890	59757.5
858540	69062.6	66245.2
354660	122635	142935
541122	44136.6	49493.4
205764	58332.5	55409.9
22027.6	57368.3	50206.6
100721	32866.7	40477.1
332276	111481	139851
194835	49472.2	81590.7
736502	104126	56279.2
212224	62717.7	65409.3
66115.8	53194.9	42385.4
63538.1	47472.2	45673.9
783202	106678	134130
22759.1	57714.5	188077
62904.8	57561.2	15907.9
669581	37025.4	45447
129845	35614.7	38017.1
44401	48035.6	83414.3
349950	26858.7	27734
61743.2	81160.3	103019
59279.2	67556.3	107508
149727	59518.4	98850.7
175947	56024	134616
162887	23312.8	102868
135389	28631.5	193450
365258	38606.3	303315
248546	105688	324206
131543	41279.4	189898
81611.4	18875.5	151105
108366	23298.7	81174.4
190399	132960	257020
329990	51297.4	128524
216762	88629.6	43551.3
704420	43412.6	67923
91399.5	108547	436610
172151	23172	598278
51151.4	73410.1	168359
49888.4	31199.6	344678
178740	122334	50235.2
151848	48952	349306
173385	33336.7	308084
90677.4	114219	117880
54907.7	14501.5	156030
453400	30245.4	247334
23767.8	23362.7	78386.1
552370	48171.2	176211
69655.8	59083.2	26980.3
1.06946e+06	26041	63648.7
417155	95787.1	62632.2
86559.1	55540.8	666178
298270	55723.5	116695
503493	184269	123788
135102		87521.5
835479		99001
162757		63194.8
217090		137058
76935.8		66134.7
1.57672e+06		355387
109475		34072.7
544224		210395
427199		34036.1
217956		400271
221747		276457
233578		103205
683342		74945.3
1639897		48513.4
226932		197015
80856.8		76005.5
124866		143310
334514		264100
437485		201987
107581		105070
1.26642e+06		389094
279628		148940
75428.1		115559
294475		48184.3
193957		170400
134592		87558.1
214830		100646
128640		106459
94589.1		109420
185218		62807.8
219365		43212.4
353436		98588.3
		70448.6
		13843.9
		66647.5
		38850
		25001.1
		174575
		55421.2
		278941
		77332
		282034
		38184.2
		86821.5
		89151.9
		82993.1
		65110.7
		38317.4
		43213.5
		83245.6
		65016.3
		35254.3
		134839
		130399
		78099.4
		125305
		116483
		114027
		40840.6
		44579.6
		166286
		62548
		63351.8
		87491.3
		45042
		25733.5
		81162.2
		138122
		120751

## Sheet: Fig2F
Figure 2F: Number of LSCC tumors per mouse
Vehicle	Tam	Tam+FT		Number of families	1
50	21	10		Number of comparisons per family	3
46	10	12		Alpha	0.05
45	23	7
80	5	17		Tukey's multiple comparisons test	Mean Diff.	95.00% CI of diff.	Below threshold?	Summary	Adjusted P Value
60	25	7		Vehicle vs. Tam	43.07	30.72 to 55.42	Yes	****	1.04078e-07	A-B
50	9	11		Vehicle vs. Tam + FT	47.21	34.86 to 59.57	Yes	****	2.46224e-08	A-C
75	15	15		Tam vs. Tam + FT	4.143	-8.615 to 16.90	No	ns	0.69251	B-C
62
				Test details	Mean 1	Mean 2	Mean Diff.	SE of diff.	n1	n2	q	DF
				Vehicle vs. Tam	58.5	15.43	43.07	4.863	8	7	12.53	19
				Vehicle vs. Tam + FT	58.5	11.29	47.21	4.863	8	7	13.73	19
				Tam vs. Tam + FT	15.43	11.29	4.143	5.022	7	7	1.167	19

## Sheet: Fig2G
Figure 2G: Size of LSCC tumors (um^2)
Vehicle	Tam	Tam+FT		Number of families	1
43262	28818	37649		Number of comparisons per family	3
65614	31130	92147		Alpha	0.05
28101	26545	80154
35499	62581	80955		Tukey's multiple comparisons test	Mean Diff.	95.00% CI of diff.	Below threshold?	Summary	Adjusted P Value
28092	63700	50557		Vehicle vs. Tam	68077	31240 to 104915	Yes	****	5.02122e-05	A-B
23154	21500	120615		Vehicle vs. Tam + FT	71412	30543 to 112282	Yes	***	0.000137977	A-C
25761	49719	65010		Tam vs. Tam + FT	3335	-45406 to 52076	No	ns	0.985843	B-C
33221	70185	97881
65004	122956	112035		Test details	Mean 1	Mean 2	Mean Diff.	SE of diff.	n1	n2	q	DF
169346	49918	84127		Vehicle vs. Tam	114996	46919	68077	15671	326	103	6.143	505
30633	10919	53804		Vehicle vs. Tam + FT	114996	43584	71412	17386	326	79	5.809	505
43897	34482	57136		Tam vs. Tam + FT	46919	43584	3335	20735	103	79	0.2274	505
65886	2642	22367
54958	67645	38585
32589	101151	50924
111712	42109	32374
28816	63448	29345
37864	58161	64049
48239	48461	48684
71294	10032	53872
165390	16105	58040
268568	26758	25051
54957	29830	17775
144896	35289	17678
34307	134417	45766
95050	74678	38794
186656	72517	23547
27972	14318	28842
161452	79078	20191
552469	47026	27182.2
364717	7363	32510.3
77944	38679	12280.1
49729	87000	19091.9
107814	44484	11320.4
20672	30778	5462.7
54201	40715	33489.9
45720	9139	75631.4
69177	22400	11387.4
62608	33204	39768.8
143346	160008	5142.4
102644	67128	32433
48708	79560	28953.6
52424	65078	39071.6
24910	12640	52735.1
69912	12420	19021
17331	88639	41432.5
72973	13326	7067.9
43815	22504	26153.7
40100	28170	18353.4
152245	68759	11517.4
36654	54309	60134.6
79143	29470	5124
167095	118316	23377.3
39789	24690	31669.3
67258	156422	1231.2
21967	27255.2	47864.4
145599	10197	11168.8
12950	85429.1	22181.2
26447	45198.6	46523.3
388847	130188	5961.6
70752	32181.5	19561
814275	111126	41659
56057	19676	91313.2
128714	93472.8	30595.2
124915	35930.2	47804.6
39622	26999.9	16221.2
62424	30596.3	47811.1
29942	22317.5	281207
93595	17651.5	22734.3
173960	15041.2	49750.7
370352	17973.9	45054.9
28275	24294.3	27810.4
109422	18872.4	43668.6
30931	33447.4	48618.9
117496	35356.3	46655.3
167186	13707.8	59046.8
133808	99213.4	18214.9
241808	33312	77071.5
254767	26996.8	75137.2
216555	20770.8
139506	42889.3
74117	47072.2
97509	49653
75144	34075
199254	23378.7
114904	63042.7
36621	39502.1
37255	45263.3
68015	67956.4
201655	27170.9
99217	144341
21988	2800.1
36976	53568.5
40904	38905.6
146741	44249.6
47952	25789.2
43404	4452.8
150793	38676.3
130514	2631.3
63497	38132.8
26447	44310.5
69180	86378.1
46195	29856.3
50922
85735
170580
110511
73213
149187
35804
59631
92294
70679
50040
51747
54822
15445
38981
129454
337269
186975
147717
163285
51415
17986
104740
87938
100427
29377
92323
53442
304724
291055
256413
135020
54299
77577
289331
91511
236630
188403
95362.1
55460.6
95193.7
149649
39195.9
167578
30223.5
29469.9
91425.6
73656.5
52808.7
129605
112334
35522.9
73540.5
30402.8
72911.6
50862.3
54646
232434
18188.4
8457.9
207044
38052.5
140858
351007
39952.5
73167.4
229748
359303
124755
95413.7
105948
144435
838049
10082
62985.7
265488
19826.2
28425.9
18900
42109.9
154553
221816
333504
22776.8
34771.9
32743.2
148598
14060.2
12007.4
7455.9
82868.5
348198
21459.2
4807.9
283058
20997.4
164075
41564.8
7459.8
20049.2
7296.1
41849.3
24576.2
44465.9
29561.5
9426.5
510913
24980
4059.9
295804
82054.6
36347.4
46327.4
375839
15429.2
247760
138556
5952.5
42871.5
203474
889261
40681.1
221161
139221
6273
151046
3834.7
19476.3
9484.9
26575
121589
35100
53782.9
250483
1.47929e+06
30522.5
992543
1.6653e+06
159612
21087.7
68261.5
87310.6
7673.3
74211.5
175574
343375
54221.7
29939.7
25338.7
12760.4
270562
336221
20302.3
80896.4
332478
25966.5
170585
97527
37145.4
119062
11844.9
142349
73057.2
57196.3
83049.2
445138
75892.2
67796.7
28193
89204.2
114690
138193
50594.7
60630.5
58461.5
34880.1
15549.2
25374.4
35576.6
47249.2
176219
58494.5
63286.2
60982.2
115756
211164
85263.8
18901.5
116727
22265.2
52149.8
23692.7
80078.7
44122.1
51958.9
40432.4
38225.4
14324.9
72594.9
95402.8
128090
34340.6
13831.6
67139.3
77353
140664
112362
38184.9
7453
46409.8
54828.5
27933.7
94375
64602.3
40579.7
16839.3
44456.3
77042.9
71584.1
241650
36408
30926.9
69185.3
