# Supplementary material for: USP28 deletion and small-molecule inhibition destabilizes c-MYC and elicits regression of squamous cell lung carcinoma
Source: eLife. 2021 Oct 12;10:e71596. doi: 10.7554/eLife.71596 (PMC8553340; doi:10.7554/eLife.71596)
Supplement: Figure 3—source data 1. [file elife-71596-fig3-data1.xlsx]

## Sheet: Fig3C
Figure 3C: Number of tumors
Vehicle	Tam		Column A	Vehicle
25	36		vs.	vs.
14	44		Column B	Tam
10	14
37	12		Unpaired t test
29	14		P value	0.637466
21	20		P value summary	ns
13	18		Significantly different (P < 0.05)?	No
23	26		One- or two-tailed P value?	Two-tailed
34	21		t, df	t=0.4793, df=18
13	36
			How big is the difference?
			Mean of column A	21.9
			Mean of column B	24.1
			Difference between means (A - B) ± SEM	-2.200 ± 4.590
			95% confidence interval	-11.84 to 7.442
			R squared (eta squared)	0.0126
			F test to compare variances
			F, DFn, Dfd	1.373, 9, 9
			P value	0.644386
			P value summary	ns
			Significantly different (P < 0.05)?	No
			Data analyzed
			Sample size, column A	10
			Sample size, column B	10

## Sheet: Fig3D
Figure 3D: Size of LADC tumors (um^2)
Vehicle	Tam		Column A	Vehicle
516447	421255		vs.	vs.
1.60767e+06	1.07419e+06		Column B	Tam
275636	1.58438e+06
85356.7	201059		Unpaired t test
98559.7	123476		P value	0.963278
2.16419e+06	322037		P value summary	ns
183776	14167246		Significantly different (P < 0.05)?	No
134997	158198		One- or two-tailed P value?	Two-tailed
145060	219025		t, df	t=0.0460887403273316, df=238
1.26387e+06	193906
1.22759e+06	77843.3		How big is the difference?
142793	195691		Mean of column A	975615
665948	259359		Mean of column B	987528
1.09335e+06	446733		Difference between means (A - B) ± SEM	-11913.2488811190 ± 258485.018173824
277609	121275		95% confidence interval	-521123.960343658 to 497297.462581420
169896	5694100		R squared (eta squared)	8.92501e-06
572380	100758
270526	115330		F test to compare variances
2.17867e+06	1.05398e+06		F, DFn, Dfd	1.69990646682680, 129, 109
1015939	652153		P value	0.00457898
460555	69806.6		P value summary	**
7171782	375339		Significantly different (P < 0.05)?	Yes
300130	2.22269e+06
935998	1.02895e+06		Data analyzed
858611	83526		Sample size, column A	110
143004	95037.9		Sample size, column B	130
3.7754e+06	3.49484e+06
1086239	2.81021e+06
673837	1669523
243312	1.0707e+06
334224	802546
120341	93267.6
488185	14665552
229507	98104.2
246799	749691
6.38007e+06	1.05121e+06
2.48009e+06	221766
194573	692937
4.46328e+06	3.12567e+06
78981.6	437829
204474	672912
518195	681057
759169	610381
165872	508347
82071.1	72428.3
742631	527289
705025	115294
562623	59193
319492	294139
587378	91955.9
539380	482727
115708	24545.1
793886	41769.2
1.21985e+07	232924
1.36508e+06	218498
458794	2.37923e+06
186109	156228
71627.4	1.06476e+07
524933	340392
160977	2.10363e+06
4.0715e+06	1.07284e+06
304730	200015
4336112	1.66363e+06
3.7395e+06	174474
824102	115498
743574	2.4903e+06
920900	150800
1.27852e+06	1.38168e+06
547958	2.91001e+06
123670	41754.8
244126	70991.3
5984925	722050
697956	227576
1.11105e+06	133752
918417	189018
3.02808e+06	250848
158052	505248
320982	619135
375654	200925
858970	321134
237594	379370
268006	1.79462e+06
1.5667e+06	247943
138674	135845
1033051	8.99685e+06
311652	1.62808e+06
392222	312416
327670	112244
359916	88412.3
648258	264254
443492	373322
97808	47001.5
474888	46180.8
327374	2.57628e+06
197650	67550.6
71108.1	216576
488948	1.86801e+06
188754	87326.1
463775	2.31445e+06
515590	362769
114969	372406
157257	38687.4
93337.2	75467.2
394410	50372.6
42753.3	159714
54168.8	178561
411192	466440
222777	43810.2
108308	243716
759404	73834.1
	131899
	62452.7
	385835
	102386
	218387
	1.24079e+06
	168261
	371766
	115500
	199264
	322560
	170194
	326917
	2.62184e+06
	729330
	114755
	291283
	122336
	1.06498e+06
	251990
