# Supplementary material for: USP28 deletion and small-molecule inhibition destabilizes c-MYC and elicits regression of squamous cell lung carcinoma
Source: eLife. 2021 Oct 12;10:e71596. doi: 10.7554/eLife.71596 (PMC8553340; doi:10.7554/eLife.71596)
Supplement: Figure 4—figure supplement 1—source data 1. [file elife-71596-fig4-figsupp1-data1.xlsx]

## Sheet: Fig4-FigS1D
Figure 4 – figure supplement 1D: Cell number (%)
siControl +Vehicle	siControl +FT	siUsp28-1 +Vehicle	siUsp28-1 +FT	siUsp28-2 +Vehicle	siUsp28-2 +FT
96.5092	57.9055	45.1745	47.2279	31.2115	36.1396
103.491	59.5483	50.1027	49.2813	33.6756	32.8542
102.589	55.0162	51.1327	51.7799	34.3042	35.5987
97.411	52.4272	50.1618	48.5437	35.5987	33.9806
98.9501	49.8688	42.7822	38.0577	26.2467	23.622
101.05	46.7192	40.4199	36.7454	28.8714	24.147
99.422	46.2428	39.3064	33.526	27.7457	26.5896
100.578	43.4682	38.3815	36.9942	30.0578	23.1214
Number of families	1
Number of comparisons per family	15
Alpha	0.05
Tukey's multiple comparisons test	Mean Diff.	95.00% CI of diff.	Below threshold?	Summary	Adjusted P Value
siControl +Vehicle vs. siControl +FT	48.6005	40.8726014445052 to 56.3283803804948	Yes	****	1.057e-12	A-B
siControl +Vehicle vs. siUsp28-1 +Vehicle	55.3173	47.5894022945052 to 63.0451812304948	Yes	****	1.057e-12	A-C
siControl +Vehicle vs. siUsp28-1 +FT	57.2305	49.5025799195052 to 64.9583588554948	Yes	****	1.057e-12	A-D
siControl +Vehicle vs. siUsp28-2 +Vehicle	69.0361	61.3081662945052 to 76.7639452304948	Yes	****	1.057e-12	A-E
siControl +Vehicle vs. siUsp28-2 +FT	70.4934	62.7654682320052 to 78.2212471679948	Yes	****	1.057e-12	A-F
siControl +FT vs. siUsp28-1 +Vehicle	6.7168	-1.01108861799481 to 14.4446903179948	No	ns	0.121115	B-C
siControl +FT vs. siUsp28-1 +FT	8.62998	0.902089007005193 to 16.3578679429948	Yes	*	0.0207499	B-D
siControl +FT vs. siUsp28-2 +Vehicle	20.4356	12.7076753820052 to 28.1634543179948	Yes	****	1.15864e-08	B-E
siControl +FT vs. siUsp28-2 +FT	21.8929	14.1649773195052 to 29.6207562554948	Yes	****	1.92157e-09	B-F
siUsp28-1 +Vehicle vs. siUsp28-1 +FT	1.91318	-5.81471184299481 to 9.64106709299481	No	ns	0.975794	C-D
siUsp28-1 +Vehicle vs. siUsp28-2 +Vehicle	13.7188	5.99087453200519 to 21.4466534679948	Yes	****	5.62785e-05	C-E
siUsp28-1 +Vehicle vs. siUsp28-2 +FT	15.1761	7.44817646950519 to 22.9039554054948	Yes	****	8.9615e-06	C-F
siUsp28-1 +FT vs. siUsp28-2 +Vehicle	11.8056	4.07769690700519 to 19.5334758429948	Yes	***	0.000590383	D-E
siUsp28-1 +FT vs. siUsp28-2 +FT	13.2629	5.53499884450519 to 20.9907777804948	Yes	****	9.93396e-05	D-F
siUsp28-2 +Vehicle vs. siUsp28-2 +FT	1.4573	-6.27058753049481 to 9.18519140549481	No	ns	0.992888	E-F
Test details	Mean 1	Mean 2	Mean Diff.	SE of diff.	n1	n2	q	DF
siControl +Vehicle vs. siControl +FT	100	51.3995	48.6005	2.58869	8	8	26.5507	42
siControl +Vehicle vs. siUsp28-1 +Vehicle	100	44.6827	55.3173	2.58869	8	8	30.2201	42
siControl +Vehicle vs. siUsp28-1 +FT	100	42.7695	57.2305	2.58869	8	8	31.2653	42
siControl +Vehicle vs. siUsp28-2 +Vehicle	100	30.9639	69.0361	2.58869	8	8	37.7147	42
siControl +Vehicle vs. siUsp28-2 +FT	100	29.5066	70.4934	2.58869	8	8	38.5108	42
siControl +FT vs. siUsp28-1 +Vehicle	51.3995	44.6827	6.7168	2.58869	8	8	3.66942	42
siControl +FT vs. siUsp28-1 +FT	51.3995	42.7695	8.62998	2.58869	8	8	4.71459	42
siControl +FT vs. siUsp28-2 +Vehicle	51.3995	30.9639	20.4356	2.58869	8	8	11.164	42
siControl +FT vs. siUsp28-2 +FT	51.3995	29.5066	21.8929	2.58869	8	8	11.9602	42
siUsp28-1 +Vehicle vs. siUsp28-1 +FT	44.6827	42.7695	1.91318	2.58869	8	8	1.04518	42
siUsp28-1 +Vehicle vs. siUsp28-2 +Vehicle	44.6827	30.9639	13.7188	2.58869	8	8	7.49462	42
siUsp28-1 +Vehicle vs. siUsp28-2 +FT	44.6827	29.5066	15.1761	2.58869	8	8	8.29075	42
siUsp28-1 +FT vs. siUsp28-2 +Vehicle	42.7695	30.9639	11.8056	2.58869	8	8	6.44944	42
siUsp28-1 +FT vs. siUsp28-2 +FT	42.7695	29.5066	13.2629	2.58869	8	8	7.24557	42
siUsp28-2 +Vehicle vs. siUsp28-2 +FT	30.9639	29.5066	1.4573	2.58869	8	8	0.79613	42
