# Supplementary material for: USP28 deletion and small-molecule inhibition destabilizes c-MYC and elicits regression of squamous cell lung carcinoma
Source: eLife. 2021 Oct 12;10:e71596. doi: 10.7554/eLife.71596 (PMC8553340; doi:10.7554/eLife.71596)
Supplement: Figure 4—source data 1. [file elife-71596-fig4-data1.xlsx]

## Sheet: Fig4F
Figure 4F: Cell survival (%)
Vehicle
99.9818	105.637	101.287	95.694
FT206 0.009uM
99.4854	102.001	103.204	94.0657
FT206 0.019uM
100.474	104.205	95.7603	108.183
FT206 0.039uM
87.5752	99.6493	104.055	103.454
FT206 0.078uM
66.4215	80.7555	77.5771	79.2607
FT206 0.15uM
36.2332	42.9702	34.9622	34.8117
FT206 0.31uM
15.2574	17.9276	16.6641	15.1978
FT206 0.62uM
3.283	4.78686	5.33706	4.45242
FT206 1.25uM
0.397009	0.539963	0.442891	0.545271
FT206 2.5uM
0.0917633	0.125511	0.156225	0.151675
FT206 5uM
0.142574	0.19604	0.218791	0.230167
