# Supplementary material for: USP28 deletion and small-molecule inhibition destabilizes c-MYC and elicits regression of squamous cell lung carcinoma
Source: eLife. 2021 Oct 12;10:e71596. doi: 10.7554/eLife.71596 (PMC8553340; doi:10.7554/eLife.71596)
Supplement: Figure 5—source data 1. [file elife-71596-fig5-data1.xlsx]

## Sheet: Fig5C
Figure 5C: Number of LADC tumors per mouse
Vehicle	FT206		Column A	Vehicle
70	100		vs.	vs.
79	78		Column B	FT206
67	73
59	39		Unpaired t test
24	62		P value	0.939
35	49		P value summary	ns
33	34		Significantly different (P < 0.05)?	No
	30		One- or two-tailed P value?	Two-tailed
	31		t, df	t=0.07782, df=15
	19
			How big is the difference?
			Mean of column A	52.43
			Mean of column B	51.5
			Difference between means (A - B) ± SEM	0.9286 ± 11.93
			95% confidence interval	-24.50 to 26.36
			R squared (eta squared)	0.0004036
			F test to compare variances
			F, DFn, Dfd	1.458, 9, 6
			P value	0.666383
			P value summary	ns
			Significantly different (P < 0.05)?	No
			Data analyzed
			Sample size, column A	7
			Sample size, column B	10

## Sheet: Fig5D
Figure 5D: Size of LADC tumors (um^2)
Vehicle	FT206		Column A	Vehicle
350233	73457		vs.	vs.
283375	49479		Column B	FT206
54533	89795
166459	19845		Unpaired t test
72154	211585		P value	0.608773
119644	74940		P value summary	ns
46241	38670		Significantly different (P < 0.05)?	No
109305	16834		One- or two-tailed P value?	Two-tailed
80618	18194		t, df	t=0.5120, df=783
43452	21808
239322	4386		How big is the difference?
208030	24742		Mean of column A	145602
176940	58543		Mean of column B	141547
175750	41763		Difference between means (A - B) ± SEM	4055 ± 7920
136362	24647		95% confidence interval	-11491 to 19601
104494	7181		R squared (eta squared)	0.0003347
151599	16322
147934	6645		F test to compare variances
97470	6769		F, DFn, Dfd	2.019, 480, 303
93604	3408		P value	<0.0000000001
146119	3617		P value summary	****
71568	18992		Significantly different (P < 0.05)?	Yes
80441	9317
138374	47559		Data analyzed
153108	96673		Sample size, column A	304
113444	34139		Sample size, column B	481
78275	36482
113248	40283
203263	2905
146163	89517
355077	34406
207887	106675
70120	11075
111822	21500
85515	68956
115134	79715
225040	42226
191399	25424
73815	27051
93381	34422
43231	43718
85207	116434
148761	43466
63790	15302
67362	11396
179638	12802
103017	11243
60788	5652
108114	574830
110126	213942
91547	115142
97713	114265
157267	102374
65336	232398
276019	303603
435890	75719
315700	456616
296931	183309
133732	81314
90549	218769
50398	149973
170166	161986
145556	166276
48953	200832
64691	240883
180337	397283
229553	196008
144394	250424
216490	146058
286766	135035
108862	223795
300287	174934
105193	485450
209150	312225
67865	185837
34292	211003
271233	236151
230162	342734
63661	347138
135338	344452
112296	102461
215584	240739
180136	141780
170651	212885
148152	126781
197880	204392
101426	197715
198736	177992
219270	95310
66209	113164
36842	33621
53009	54269
101624	82852
54045	117089
136606	251088
218877	158607
121543	73642
86423	155859
94936	253619
71424	128691
72816	679426
82235	185438
100637	116485
435134	287178
293714	229405
126690	640666
115425	369047
253675	84062
145042	367063
229377	200037
153170	220840
90141	193065
66373	191765
111479	129987
298227	120476
301232	87173
78981	127444
90522	82663
74951	294731
173029	169005
112034	90457
224086	65886
156616	169101
70021	384680
89199	673758
51108	365274
101094	156967
131001	70039
227450	56836
120461	350716
102124	233062
272118	165741
222621	263105
210911	56124
296793	70067
163743	67569
113167	149968
84602	71068
162039	208258
274201	218240
244525	234923
161402	159752
138219	183536
72596	177137
206654	86043
156343	64186
162169	33346
128399	158022
81388	198420
220128	128653
106270	310697
117791	342265
349788	185866
257635	228553
172698	152539
64365	409464
354986	157615
202922	152608
161856	97920
60509	124635
133740	236736
237560	120784
174985	118370
159523	90324
18857	331703
52914	205809
274662	410783
70311	273905
40607	422116
349099	191545
332643	202145
134807	209176
42078	110349
68966	90060
132398	189794
133217	266197
141640	169243
149275	110947
109285	169478
101783	342636
143791	260355
78169	254207
115953	195753
125292	87468
132319	202203
326969	76946
244278	182544
389213	209251
84035	273002
116296	125322
78283	239001
77647	340558
129908	52771
203610	288286
128866	198143
48398	229233
73635	93425
143223	145885
65430	204385
65538	200245
145002	230095
96223	170055
50399	135190
77123	98130
144997	359337
79188	134958
125181	190685
144724	685526
105338	99980
42996	319589
79382	115854
158260	251381
68158	95341
29951	78834
188518	562593
177995	65189
230710	118140
133925	201655
88510	337053
197302	131832
114085	96414
144484	56987
61023	62386
26643	161247
30952	182890
56799	185596
108062	340834
64659	232321
251096	436403
116598	189437
136572	170274
272545	207290
120626	310330
149190	68934
152803	171235
126672	192558
82125	242411
102069	167450
212645	192335
95793	216501
67323	145416
63163	497130
86024	393239
211962	211452
147272	123462
163429	447499
165312	208415
130788	211220
193834	197045
65810	452823
134210	95279
67360	67592
157507	85620
136911	44936
151289	83277
143338	92852
172637	55313
114894	22836
167493	69382
128956	63457
58370	123866
114077	401940
158542	707957
60371	152539
329142	128520
170509	134717
82252	274040
103027	209002
142249	48337
274922	291046
103360	113827
102454	730058
83493	222328
266392	258267
87712	147295
74390	185331
74945	329079
187881	131057
240040	343462
94518	210778
263421	152069
108066	87324
79897	149108
81054	49554
264460	80181
122180	68534
173717	220375
134653	250293
150197	111344
132340	332247
113591	481745
63533	175458
22941	109960
87534	167971
70820	190236
197575	105546
194901	293718
348713	143814
175102	32586
693498	75458
201448	101067
180238	121406
169073	45395
228049	121264
	247682
	122989
	208413
	163278
	107870
	34114
	102500
	132541
	43245
	102117
	39944
	72508
	221420
	31989
	272715
	222308
	34312
	113970
	92638
	32725
	60163
	70911
	95809
	265649
	56709
	82592
	68617
	61869
	142866
	157516
	219029
	89354
	58599
	27152
	91967
	41957
	79596
	49315
	53301
	43477
	18223
	56341
	21133
	30906
	21277
	45360
	35016
	37808
	35816
	17842
	21645
	40647
	42313
	42315
	19769
	41475
	15991
	14498
	29112
	13072
	63069
	34803
	16417
	18742
	28056
	48434
	114261
	243207
	233210
	196517
	77492
	196623
	113025
	48334
	46120
	93172
	184900
	146826
	74848
	120647
	131251
	120782
	77483
	126235
	67520
	53912
	102363
	82808
	145403
	176673
	96651
	267902
	173700
	81691
	87872
	49840
	157215
	60599
	75461
	57257
	54743
	188829
	229764
	150303
	108796
	64687
	121345
	57989
	37477
	44866
	50977
	61892
	60513
	99176
	212637
	65192
	63388
	55638
	84395
	41783
	69992
	27030
	50371
	35197
	26948
	37577
	74365
	33457
	59647
	86329
	95720
	71921
	18872
	39162
	47040
	32805
	47687
	85297
	163469
	75999
	151345
	61000
	66302
	33230
	40739
	73895
	81451
	68899
	73971
	74619
	59571
	50456
	47797
	68276
	60832
	21182
	32303
	75448
	44065
	29198
	69394
	58553
	80366
	42166
	93776
	64634
	53830
	285286
	74384
	123331
	42896
	51837
	33020
	73557
	37954
	82571
	44056

## Sheet: Fig5E
Figure 5E: Number of LSCC tumors per mouse
Vehicle	FT206		Column A	Vehicle
13	11		vs.	vs.
27	12		Column B	FT206
12	4
68	12		Unpaired t test
19	11		P value	0.00933308
40	9		P value summary	**
39	1		Significantly different (P < 0.05)?	Yes
	11		One- or two-tailed P value?	Two-tailed
	31		t, df	t=2.981, df=15
	2
			How big is the difference?
			Mean of column A	31.14
			Mean of column B	10.4
			Difference between means (A - B) ± SEM	20.74 ± 6.959
			95% confidence interval	5.910 to 35.58
			R squared (eta squared)	0.372
			F test to compare variances
			F, DFn, Dfd	5.595, 6, 9
			P value	0.0224948
			P value summary	*
			Significantly different (P < 0.05)?	Yes
			Data analyzed
			Sample size, column A	7
			Sample size, column B	10

## Sheet: Fig5F
Figure 5F: Size of LSCC tumors (um^2)
Vehicle	FT206		Column A	Vehicle
23760	16799		vs.	vs.
42467	31934		Column B	FT206
12780	1320
32422	1320		Unpaired t test
66867	2255		P value	6.21123e-08
105921	5977		P value summary	****
111036	1664		Significantly different (P < 0.05)?	Yes
22984	1905		One- or two-tailed P value?	Two-tailed
47039	133348		t, df	t=5.581, df=250
40946	7801
126001	4930		How big is the difference?
206926	7847		Mean of column A	84941
110560	8293		Mean of column B	45028
347376	4772		Difference between means (A - B) ± SEM	39913 ± 7152
91202	6844		95% confidence interval	25828 to 53998
19092	275705		R squared (eta squared)	0.1108
140095	207004
119926	125862		F test to compare variances
123066	31410		F, DFn, Dfd	1.051, 155, 95
164640	8404		P value	0.800531
59909	135055		P value summary	ns
89222	94258		Significantly different (P < 0.05)?	No
31657	60471
33976	34746		Data analyzed
32019	29209		Sample size, column A	156
43737	36188		Sample size, column B	96
15444	79972
37259	11877
20128	56627
45650	78517
61320	346210
100980	24900
87333	152938
49595	62577
148814	18504
98191	62665
88933	32819
22700	44810
70502	8638
46082	61984
72120	22944
41077	14400
177935	25202
123563	23998
18529	12695
101405	16531
61753	35196
49252	24740
104476	171333
162160	54823
162700	38422
102892	35257
38933	36339
78299	5883
54148	47860
51789	37791
31008	30187
49721	107775
40995	39115
39470	21128
179061	25953
69214	46345
39331	51489
52380	45375
50875	40247
38280	18626
51009	50460
132008	30303
278543	41814
75728	20563
182738	22893
219031	78223
43412	33195
54182	61443
45311	24911
31867	54990
115554	23173
137473	26503
94370	25856
63773	80242
73730	46299
131534	31136
187940	17945
127671	26665
67036	16076
78588	4256
45794	28365
96388	49568
35747	51485
81169	20978
70033	19014
84355	20952
111320	22284
68537	16399
25556	12573
62377	16064
48034
49586
44165
32272
110334
74464
68876
78552
69889
100317
57897
32836
34280
45235
72114
94277
53268
137874
98874
46170
211201
78133
121429
53498
80591
56563
64371
97701
93061
90976
141764
316553
193802
61744
66497
149085
118459
187118
103265
145190
155441
83523
25178
43678
48348
100577
84566
50465
37763
41882
67833
78425
54648
132063
117391
63859
82931
28612
91484
79054

## Sheet: Fig5I
Figure 5I: Number of active caspase-3-positive cells per field (20x)
LADC	LADC				LSCC	LSCC
Vehicle	FT206	Column A	Vehicle		Vehicle	FT206	Column A	Vehicle
1	1	vs.	vs.		1	7	vs.	vs.
1	1	Column B	FT206		1	1	Column B	FT206
4	1				1	1
1	1	Unpaired t test			2	1	Unpaired t test
1	1	P value	0.0515494		1	1	P value	2.38167e-07
1	1	P value summary	ns		1	2	P value summary	****
1	0	Significantly different (P < 0.05)?	No		1	8	Significantly different (P < 0.05)?	Yes
0	0	One- or two-tailed P value?	Two-tailed		1	0	One- or two-tailed P value?	Two-tailed
0	0	t, df	t=1.954, df=315		1	0	t, df	t=5.308, df=259
0	0				1	0
0	0	How big is the difference?			1	0	How big is the difference?
0	0	Mean of column A	0.1404		0	0	Mean of column A	0.2128
0	0	Mean of column B	0.2808		0	0	Mean of column B	1.449
0	0	Difference between means (A - B) ± SEM	-0.1404 ± 0.07186		0	0	Difference between means (A - B) ± SEM	-1.236 ± 0.2329
0	0	95% confidence interval	-0.2818 to 0.0009498		0	0	95% confidence interval	-1.695 to -0.7777
0	0	R squared (eta squared)	0.01198		0	0	R squared (eta squared)	0.09812
0	0				0	0
0	0	F test to compare variances			0	0	F test to compare variances
0	0	F, DFn, Dfd	1.834, 202, 113		0	0	F, DFn, Dfd	26.12, 166, 93
0	0	P value	0.000455856		0	0	P value	<0.000000000000001
0	0	P value summary	***		0	0	P value summary	****
0	0	Significantly different (P < 0.05)?	Yes		0	0	Significantly different (P < 0.05)?	Yes
0	0				0	4
0	0	Data analyzed			0	10	Data analyzed
0	0	Sample size, column A	114		0	3	Sample size, column A	94
0	0	Sample size, column B	203		0	5	Sample size, column B	167
0	0				0	3
0	0				0	3
0	0				0	3
0	0				0	6
0	0				0	1
0	0				0	1
0	0				0	2
0	0				0	4
0	0				0	1
0	0				0	2
0	0				0	2
0	0				0	1
0	0				0	1
0	0				0	2
0	0				0	0
0	0				0	0
0	0				0	0
0	0				0	0
0	0				0	0
0	0				0	0
0	0				0	0
0	0				0	0
0	0				0	0
0	0				0	0
0	0				0	0
0	1				0	0
1	1				0	0
1	1				1	0
0	1				1	0
0	2				1	0
0	1				0	0
0	1				0	2
0	2				0	1
0	1				0	1
0	3				0	3
0	0				0	5
0	0				0	2
0	0				0	3
0	0				0	2
0	0				0	2
0	0				0	1
0	0				0	1
0	0				0	1
0	0				0	1
0	0				0	1
0	0				0	2
0	0				0	2
0	0				0	2
0	0				0	6
0	0				0	1
0	0				0	2
0	0				0	7
0	0				1	4
0	0				1	5
0	0				1	4
0	0				1	4
0	0				1	1
0	0				0	3
0	0				0	1
0	0				0	1
0	0				0	1
0	0				0	1
0	0				0	1
0	0				0	1
0	0				0	4
0	1				0	3
0	1				0	3
0	1				0	8
1	2					0
2	0					0
1	0					0
0	0					0
0	0					0
0	0					0
0	0					0
0	0					0
0	0					0
0	0					0
0	0					0
0	0					0
0	0					0
0	0					0
0	0					0
0	0					0
0	0					0
0	0					0
0	0					0
0	0					0
	0					0
	0					0
	0					0
	0					0
	0					0
	0					0
	0					0
	0					0
	0					0
	0					0
	0					0
	0					0
	0					1
	0					3
	0					4
	0					8
	0					4
	0					1
	0					1
	0					2
	0					3
	0					1
	0					1
	1					3
	1					1
	1					1
	2					4
	2					1
	1					0
	0					0
	0					0
	0					0
	0					0
	0					0
	0					0
	0					0
	0					0
	0					0
	0					0
	0					0
	0					0
	0					0
	0					0
	0					6
	0					8
	0					10
	0					10
	0					1
	0					0
	0					0
	0					0
	0					0
	0					0
	0
	0
	0
	0
	0
	0
	0
	0
	0
	0
	0
	0
	0
	0
	1
	2
	2
	2
	2
	3
	1
	2
	1
	4
	3
	1
	0
	0
	0
	0
	0
	0
	0
	0
	0
	0
