# Supplementary material for: USP28 deletion and small-molecule inhibition destabilizes c-MYC and elicits regression of squamous cell lung carcinoma
Source: eLife. 2021 Oct 12;10:e71596. doi: 10.7554/eLife.71596 (PMC8553340; doi:10.7554/eLife.71596)
Supplement: Figure 6—source data 1. [file elife-71596-fig6-data1.xlsx]

## Sheet: Fig6C
Figure 6C: Cell survival (%)			Cells treated with vehicle or FT206 (0.009-5uM)
LSCC H520	Vehicle	Vehicle	Vehicle	Vehicle	Vehicle	Vehicle	Vehicle	Vehicle	0.009	0.009	0.009	0.009	0.009	0.009	0.009	0.009	0.019	0.019	0.019	0.019	0.019	0.019	0.019	0.019	0.039	0.039	0.039	0.039	0.039	0.039	0.039	0.039	0.078	0.078	0.078	0.078	0.078	0.078	0.078	0.078	0.15	0.15	0.15	0.15	0.15	0.15	0.15	0.15	0.31
	105.592	90.9101	99.0784	104.42	101.264	91.5192	101.982	105.234	101.359	102.043	99.2269	96.2062	101.54	101.622	99.6557	93.8526	98.967	95.3655	86.7755	88.8653	99.9456	96.4455	100.542	90.7406	98.8158	94.9624	91.8966	90.6899	94.7294	94.5353	91.6478	92.8519	69.6352	69.2798	56.412	67.7894	79.7049	70.673	56.9344	68.9591	46.2626	43.3665	38.6299	34.9436	45.4849	43.2918	38.4075	34.87	23.4026
LSCC CALU-1	Vehicle	Vehicle	Vehicle	Vehicle	Vehicle	Vehicle	Vehicle	Vehicle	0.009	0.009	0.009	0.009	0.009	0.009	0.009	0.009	0.019	0.019	0.019	0.019	0.019	0.019	0.019	0.019	0.039	0.039	0.039	0.039	0.039	0.039	0.039	0.039	0.078	0.078	0.078	0.078	0.078	0.078	0.078	0.078	0.15	0.15	0.15	0.15	0.15	0.15	0.15	0.15	0.31
	103.322	98.9366	97.9651	99.7765	103.875	99.85	94.8756	101.399	101.045	98.7193	98.2576	100.445	104.823	99.419	99.9257	94.6193	83.9594	90.5047	92.0862	92.502	95.3804	93.1145	94.3164	94.6309	79.6933	85.7414	86.552	90.6468	83.6569	89.5225	89.7885	93.8135	71.7587	75.3332	81.3062	77.8736	75.2943	78.995	83.4705	80.5173	62.3741	65.9236	71.7357	70.0309	65.159	69.2383	73.9681	71.5702	42.876
LSCC LUDLU-1	Vehicle	Vehicle	Vehicle	Vehicle	Vehicle	Vehicle	Vehicle	Vehicle	0.009	0.009	0.009	0.009	0.009	0.009	0.009	0.009	0.019	0.019	0.019	0.019	0.019	0.019	0.019	0.019	0.039	0.039	0.039	0.039	0.039	0.039	0.039	0.039	0.078	0.078	0.078	0.078	0.078	0.078	0.078	0.078	0.15	0.15	0.15	0.15	0.15	0.15	0.15	0.15	0.31
	109.485	106.079	92.9127	91.5237	100.072	98.7627	96.7983	104.367	103.938	103.414	99.1336	94.4839	102.601	98.3829	102.377	97.3627	103.988	101.953	98.7192	91.8835	101.472	92.6959	102.804	95.5466	100.75	104.298	95.9229	96.1598	98.6253	93.3037	95.5177	94.6241	100.245	97.6581	84.0914	90.3715	88.6947	90.5036	85.0373	81.8718	83.2535	89.2466	70.88	73.8265	73.2508	78.8112	62.3471	64.8144	57.6503
[truncated: 39 more columns]

## Sheet: Fig6D
Figure 6D: Tumor volume (mm^3) - LSCC H520
	Day			Vehicle				FT206
	0	179.595	234.573	234.573	153.938		268.083	113.098	113.098	179.595
	1	268.083	318.087	471.24	360.499		234.573	94.248	103.673	153.938
	2	448.922	445.06	981.75	761.707		206.167	94.248	94.248	102.626
	3	692.461	981.75	1321.04	1106.11		153.938	79.1945	94.248	102.626
	4	1334.13	1192.83	1649.34	1385.45		339.293	179.595	268.083	75.3984
Number of comparisons per family	5
Alpha	0.05
Bonferroni's multiple comparisons test	Mean Diff.	95.00% CI of diff.	Significant?	Summary	Adjusted P Value
Vehicle - FT206
Day
0	32.2014	-249.063 to 313.466	No	ns	>0.999999999999999
1	207.869	-73.3953 to 489.134	No	ns	0.255246
2	535.037	253.773 to 816.302	Yes	****	6.06287e-05
3	917.838	636.574 to 1199.10	Yes	****	2.67355e-09
4	1174.84	893.579 to 1456.11	Yes	****	8.25e-12
Test details	Mean 1	Mean 2	Mean Diff.	SE of diff.	N1	N2	t	DF
Vehicle - FT206
0	200.67	168.468	32.2014	102.278	4	4	0.314841	30
1	354.477	146.608	207.869	102.278	4	4	2.03239	30
2	659.36	124.322	535.037	102.278	4	4	5.2312	30
3	1025.34	107.502	917.838	102.278	4	4	8.97394	30
4	1390.44	215.592	1174.84	102.278	4	4	11.4868	30

## Sheet: Fig6E
Figure 6E: Tumor volume (mm^3) - LSCC CALU-1
	Day		Vehicle				FT206
	0	65.45	65.45	141.11		368.981	113.098	360.499
	4	196.58	153.938	378.039		227.871	101.788	283.726
	7	497.42	425.294	1061.86		318.087	132.733	381.704
	10	940.844	734.009	2010.62		296.881	132.733	132.733
Number of comparisons per family	4
Alpha	0.05
Bonferroni's multiple comparisons test	Mean Diff.	95.00% CI of diff.	Significant?	Summary	Adjusted P Value
Vehicle - FT206
0	-190.189	-851.202 to 470.824	No	ns	>0.999999999999999
4	38.3912	-622.622 to 699.404	No	ns	>0.999999999999999
7	384.017	-276.996 to 1045.03	No	ns	0.486902
10	1041.04	380.030 to 1702.06	Yes	**	0.00167981
Test details	Mean 1	Mean 2	Mean Diff.	SE of diff.	N1	N2	t	DF
Vehicle - FT206
0	90.6701	280.859	-190.189	234.98	3	3	0.809382	16
4	242.853	204.461	38.3912	234.98	3	3	0.16338	16
7	661.525	277.508	384.017	234.98	3	3	1.63425	16
10	1228.49	187.449	1041.04	234.98	3	3	4.43034	16

## Sheet: Fig6F
Figure 6F: Tumor volume (mm^3) - LSCC LUDLU-1
	Day		Vehicle				FT206
	0	4.1888	4.1888	4.1888		4.1888	4.1888	4.1888
	6	4.1888	4.1888	4.1888		4.1888	4.1888	4.1888
	11	6.545	9.4248	9.4248		4.1888	4.1888	19.2423
	14	19.2423	25.1328	20.944		14.1372	14.1372	9.4248
	17	52.36	75.3984	47.5167		14.1372	11.781	4.1888
	25	245.896	212.058	169.646		33.5104	11.781	4.1888
	28	296.881	287.98	209.44		33.5104	14.1372	4.1888
	33	475.167	527.789	339.293		42.4116	14.1372	4.1888
Number of comparisons per family	8
Alpha	0.05
Bonferroni's multiple comparisons test	Mean Diff.	95.00% CI of diff.	Significant?	Summary	Adjusted P Value
Vehicle - FT206
0	0	-71.7671 to 71.7671	No	ns	>0.999999999999999
6	0	-71.7671 to 71.7671	No	ns	>0.999999999999999
11	-0.741767	-72.5088 to 71.0253	No	ns	>0.999999999999999
14	9.20663	-62.5604 to 80.9737	No	ns	>0.999999999999999
17	48.3894	-23.3777 to 120.156	No	ns	0.456851
25	192.707	120.940 to 264.474	Yes	****	4.59186e-08
28	247.488	175.721 to 319.255	Yes	****	1.44058e-10
33	427.17	355.403 to 498.937	Yes	****	<0.000000000000001
Test details	Mean 1	Mean 2	Mean Diff.	SE of diff.	N1	N2	t	DF
Vehicle - FT206
0	4.1888	4.1888	0	24.5174	3	3	0	32
6	4.1888	4.1888	0	24.5174	3	3	0	32
11	8.46487	9.20663	-0.741767	24.5174	3	3	0.0302546	32
14	21.773	12.5664	9.20663	24.5174	3	3	0.375514	32
17	58.425	10.0357	48.3894	24.5174	3	3	1.97367	32
25	209.2	16.4934	192.707	24.5174	3	3	7.85998	32
28	264.767	17.2788	247.488	24.5174	3	3	10.0944	32
33	447.416	20.2459	427.17	24.5174	3	3	17.4231	32

## Sheet: Fig6G
Figure 6G: Tumor weight (gr) - LSCC H520
Vehicle	FT206		Column A	Vehicle
3.57	0.75		vs.	vs.
2.49	0.47		Column B	FT206
1.65	0.46
2.2	0.007		Unpaired t test
			P value	0.00312907
			P value summary	**
			Significantly different (P < 0.05)?	Yes
			One- or two-tailed P value?	Two-tailed
			t, df	t=4.759, df=6
			How big is the difference?
			Mean of column A	2.478
			Mean of column B	0.4218
			Difference between means (A - B) ± SEM	2.056 ± 0.4320
			95% confidence interval	0.9988 to 3.113
			R squared (eta squared)	0.7906
			F test to compare variances
			F, DFn, Dfd	6.896, 3, 3
			P value	0.147068
			P value summary	ns
			Significantly different (P < 0.05)?	No
			Data analyzed
			Sample size, column A	4
			Sample size, column B	4

## Sheet: Fig6H
Figure 6H: Tumor weight (gr) - LSCC CALU-1
Vehicle	FT206		Column A	Vehicle
0.82	0.21		vs.	vs.
0.46	0.11		Column B	FT206
1.08	0.1
			Unpaired t test
			P value	0.0242136
			P value summary	*
			Significantly different (P < 0.05)?	Yes
			One- or two-tailed P value?	Two-tailed
			t, df	t=3.531, df=4
			How big is the difference?
			Mean of column A	0.7867
			Mean of column B	0.14
			Difference between means (A - B) ± SEM	0.6467 ± 0.1832
			95% confidence interval	0.1382 to 1.155
			R squared (eta squared)	0.7571
			F test to compare variances
			F, DFn, Dfd	26.20, 2, 2
			P value	0.0735343
			P value summary	ns
			Significantly different (P < 0.05)?	No
			Data analyzed
			Sample size, column A	3
			Sample size, column B	3

## Sheet: Fig6I
Figure 6I: Tumor weight (gr) - LSCC LUDLU-1
Vehicle	FT206		Column A	Vehicle
0.38	0.04		vs.	vs.
0.28	0.006		Column B	FT206
0.24	0.002
			Unpaired t test
			P value	0.00280529
			P value summary	**
			Significantly different (P < 0.05)?	Yes
			One- or two-tailed P value?	Two-tailed
			t, df	t=6.552, df=4
			How big is the difference?
			Mean of column A	0.3
			Mean of column B	0.016
			Difference between means (A - B) ± SEM	0.2840 ± 0.04334
			95% confidence interval	0.1637 to 0.4043
			R squared (eta squared)	0.9148
			F test to compare variances
			F, DFn, Dfd	11.93, 2, 2
			P value	0.15472
			P value summary	ns
			Significantly different (P < 0.05)?	No
			Data analyzed
			Sample size, column A	3
			Sample size, column B	3
