# Supplementary material for: USP28 deletion and small-molecule inhibition destabilizes c-MYC and elicits regression of squamous cell lung carcinoma
Source: eLife journal article supplement (doi:10.7554/elife.71596), 2021-10-11
Supplement: supp [file elife-71596-supp-v1.zip]

**H**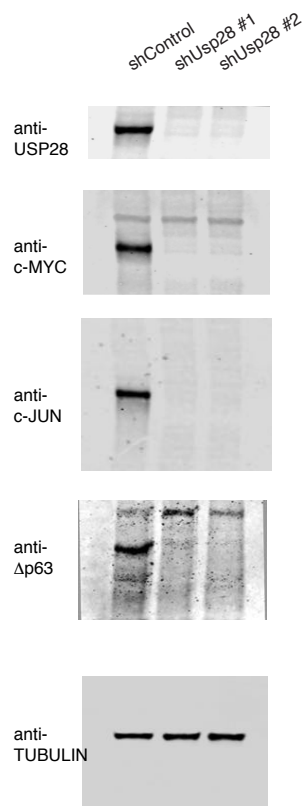**Figure 1**

**E**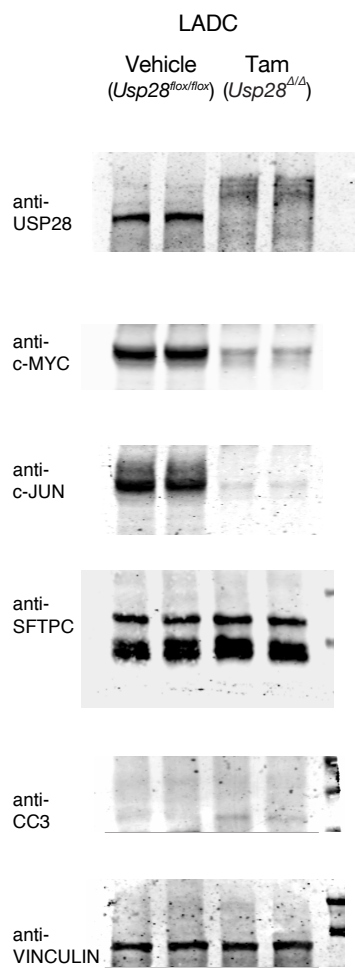**H**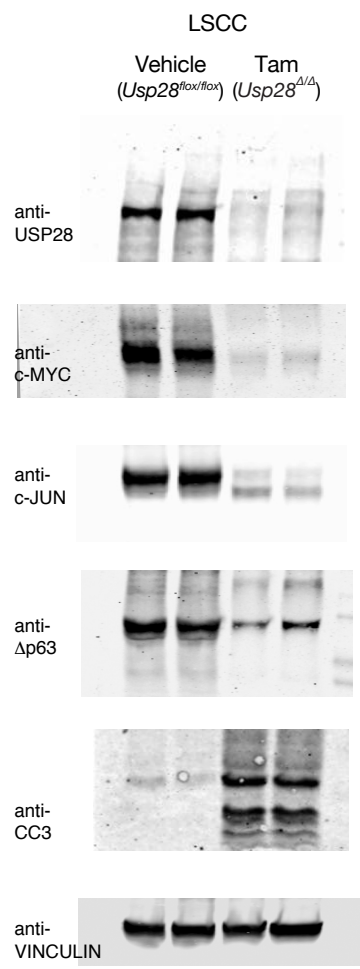**Figure 2**

**B**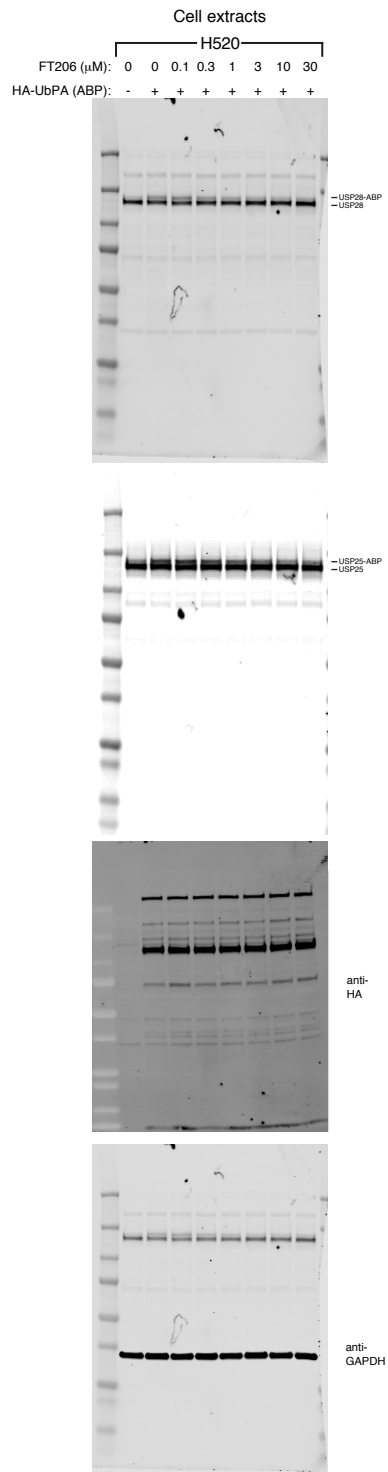**C**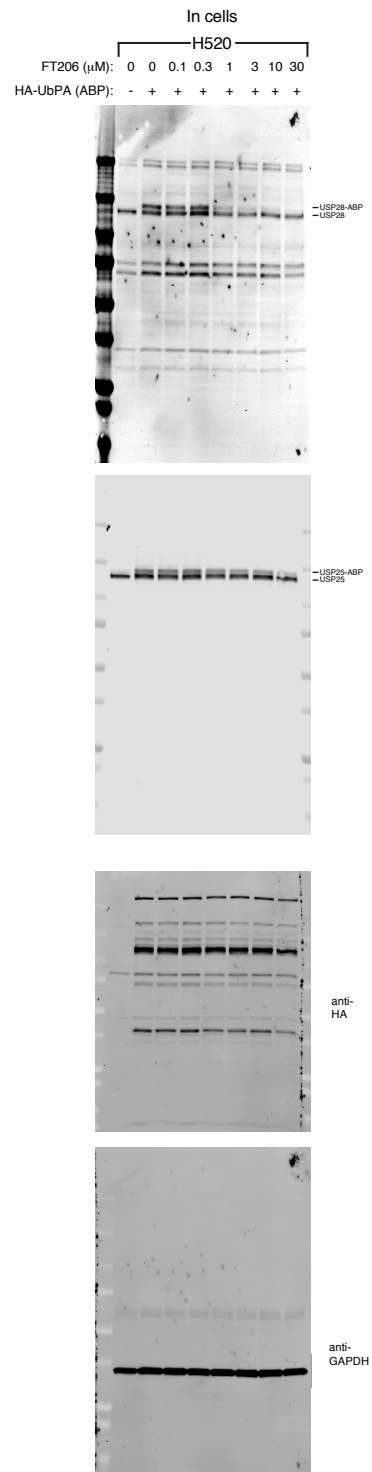**E**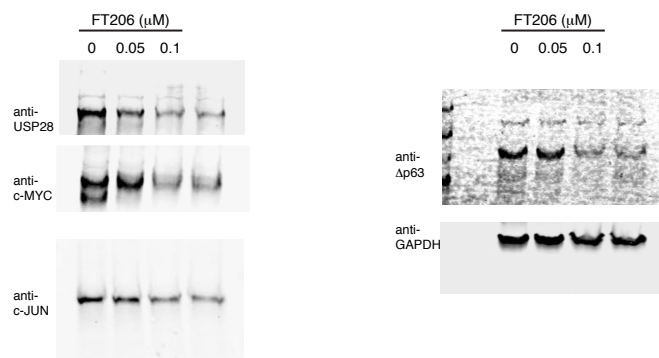**Figure 4**

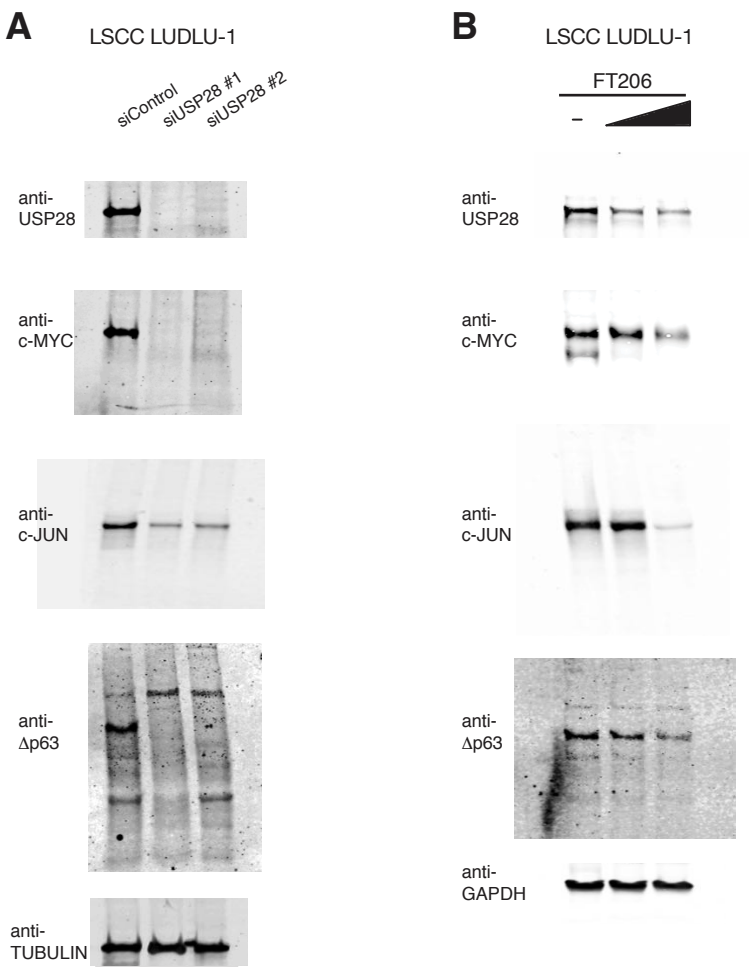

**Figure 6**



**A**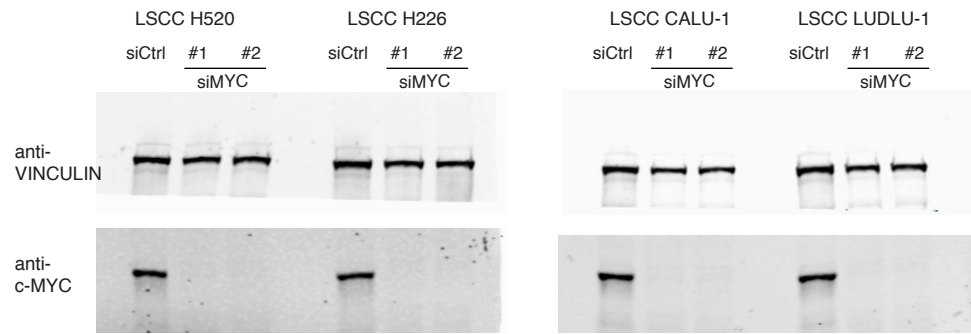**B**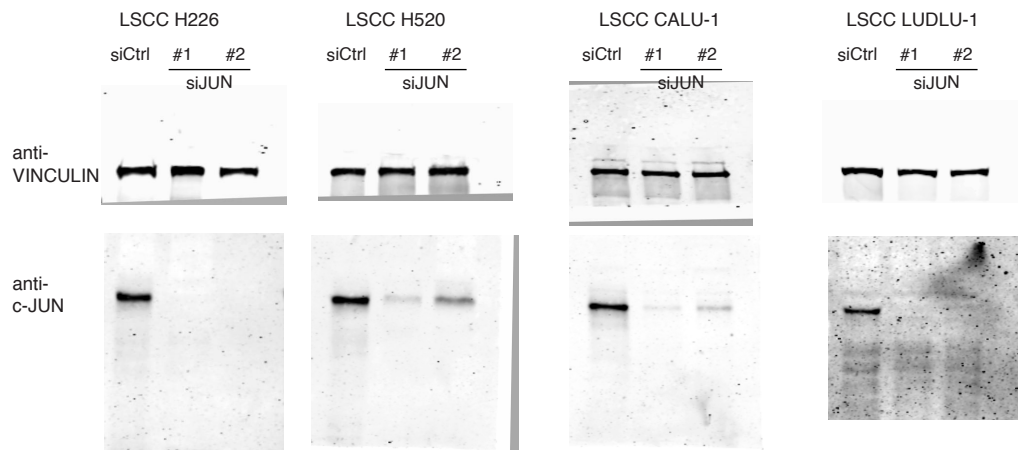**C**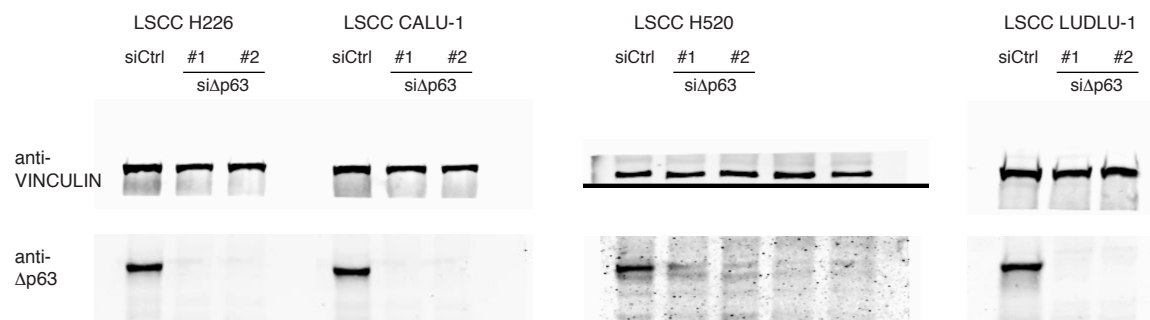**Figure 1 – figure supplement 1**

A

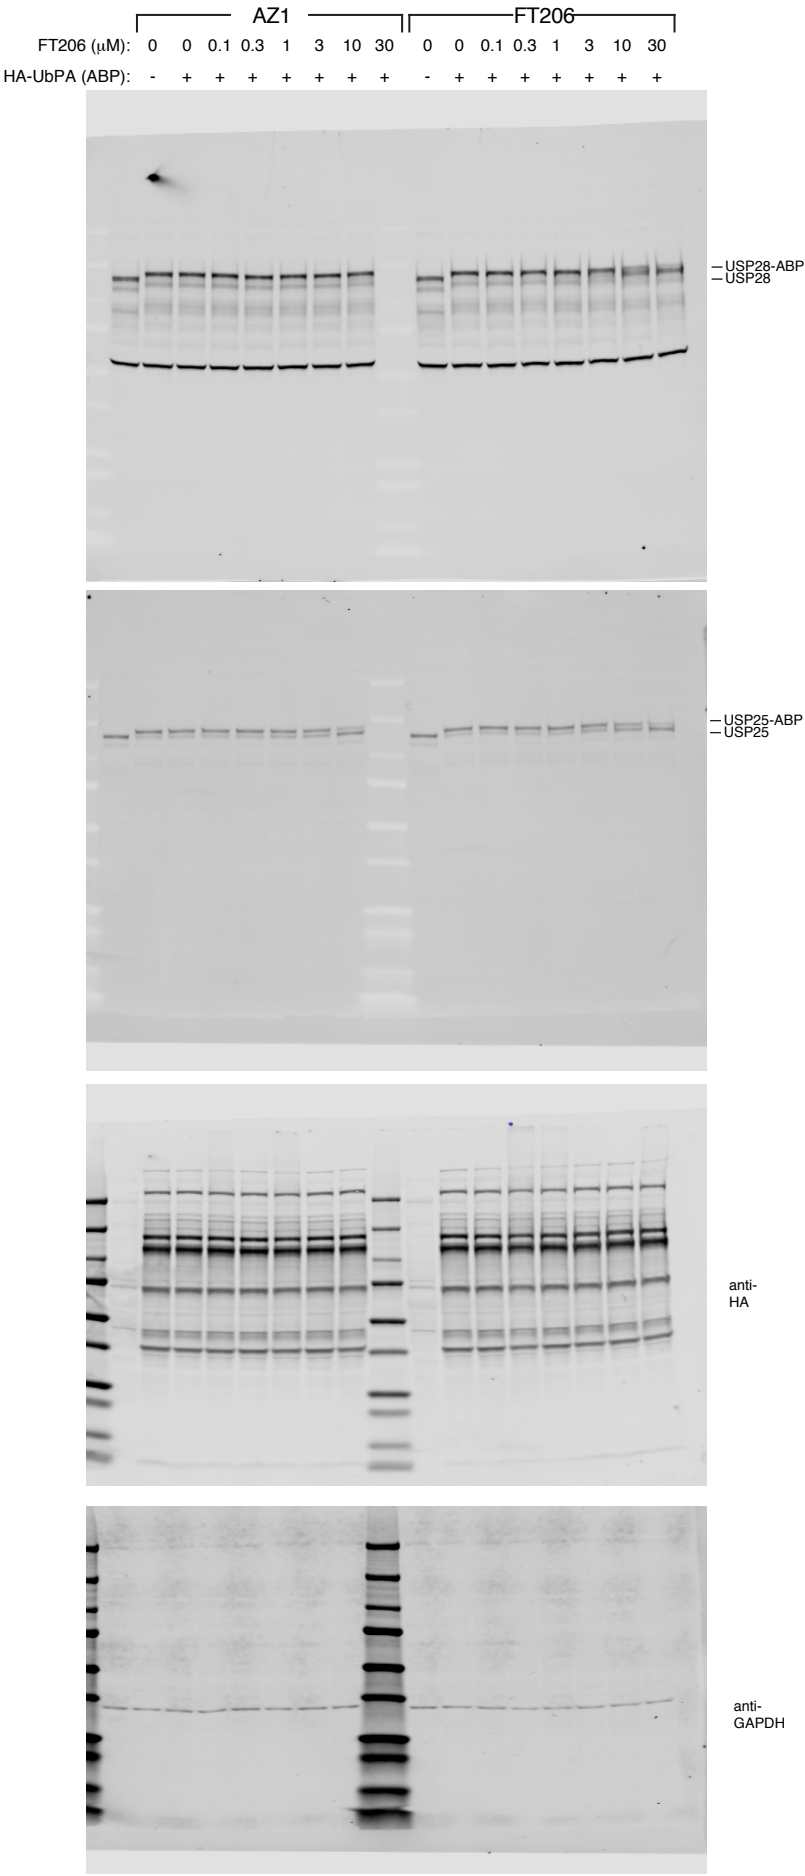

Figure 4 – figure supplement 1

**B**

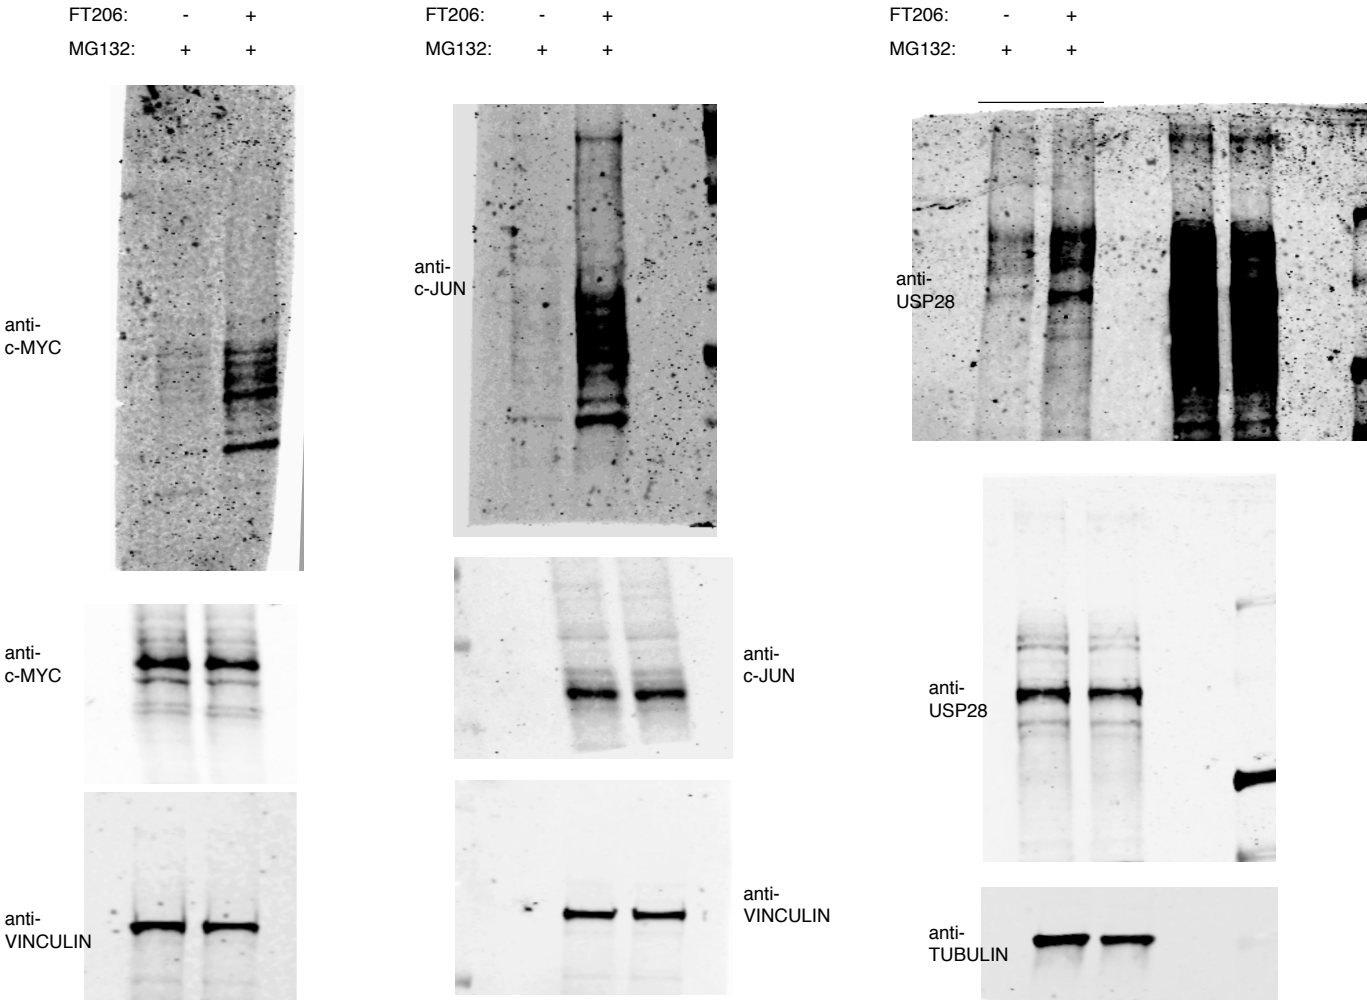

**C**

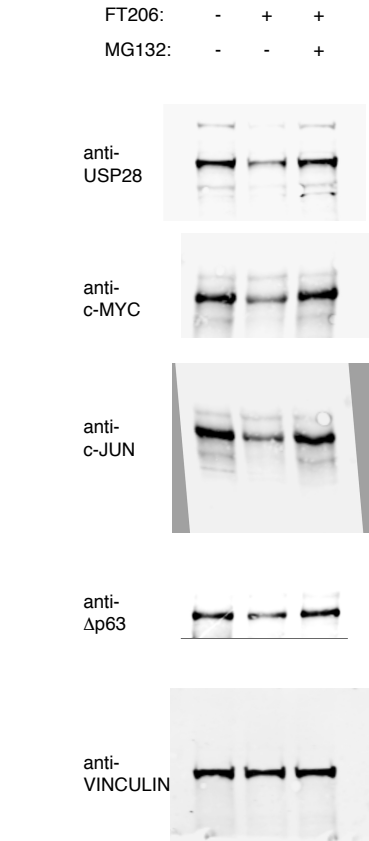

**D**

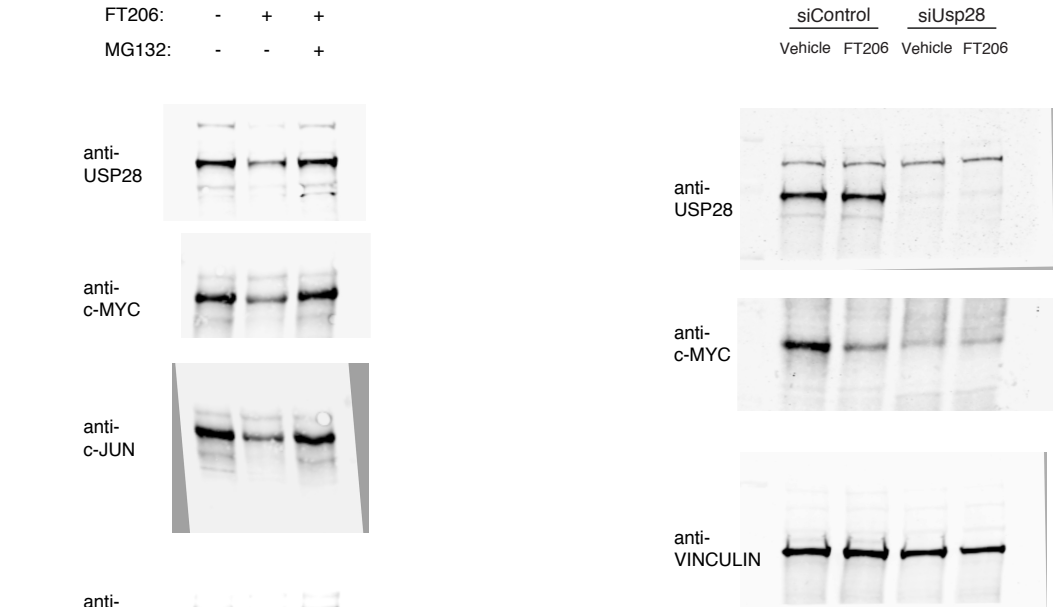

**Figure 4 – figure supplement 1**

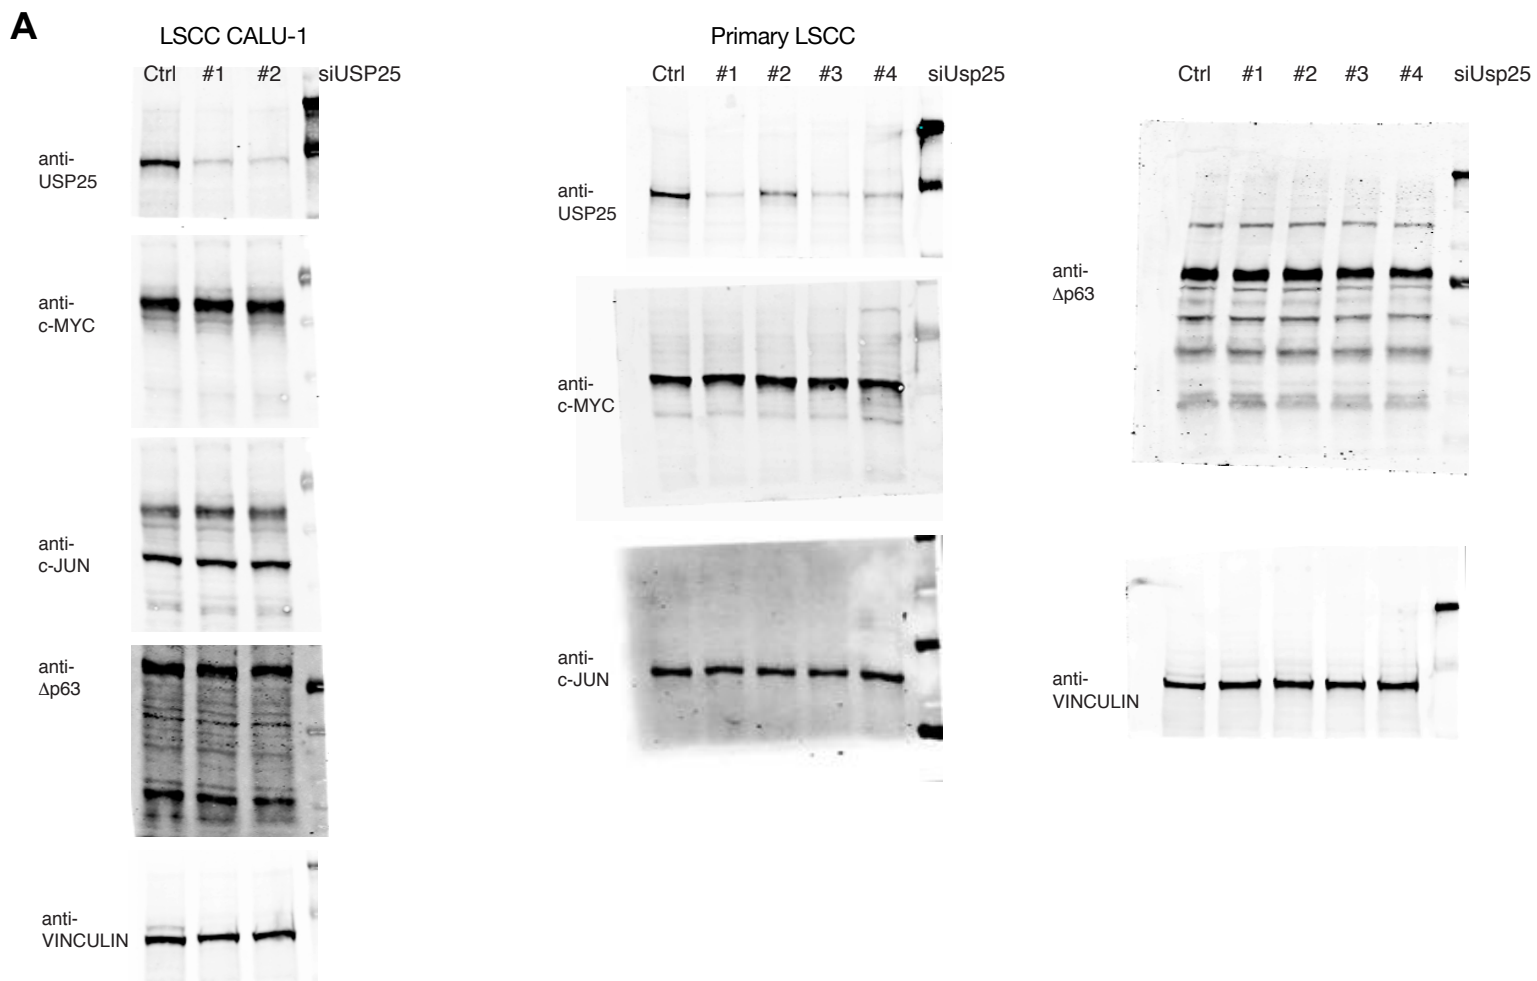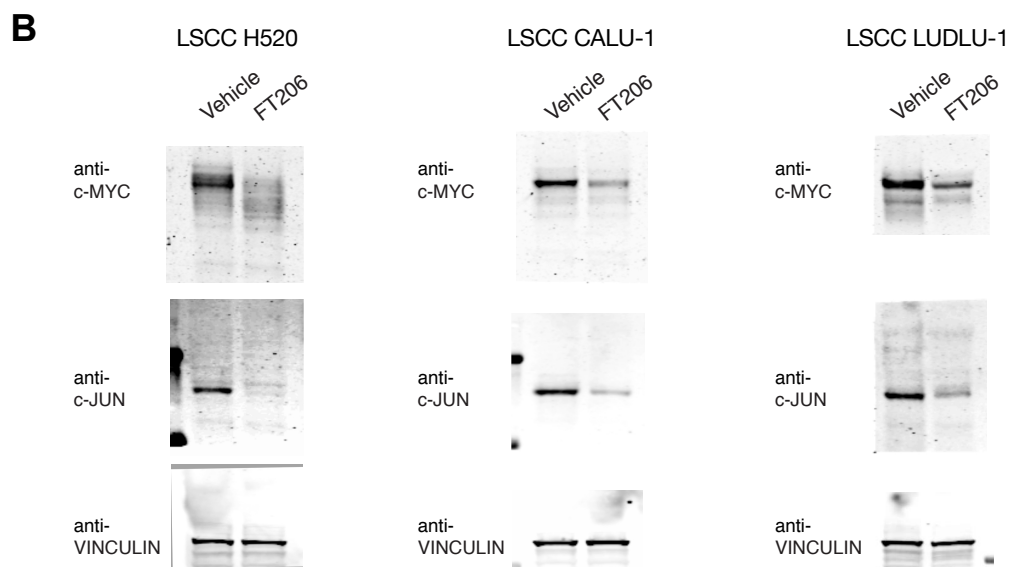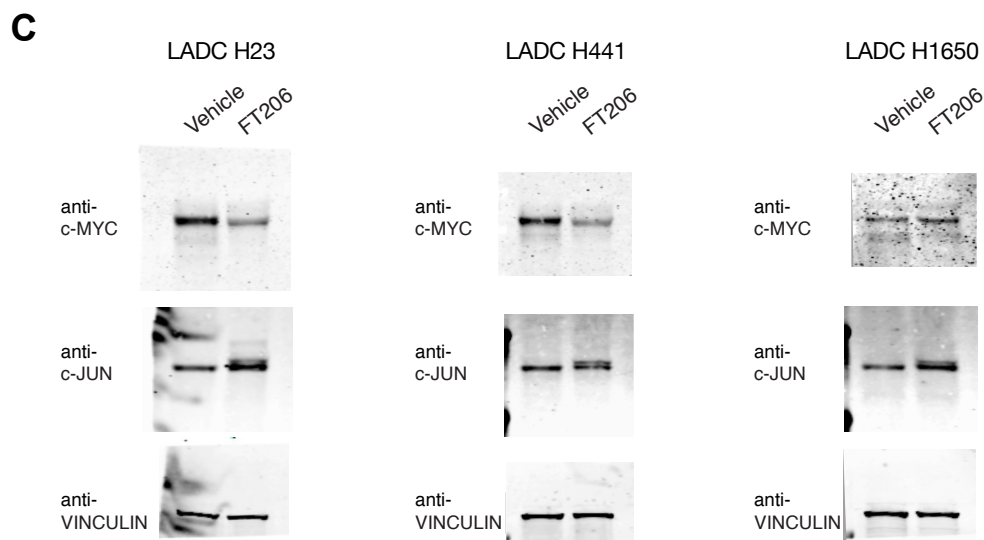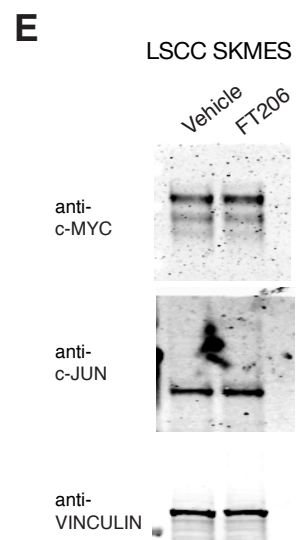

**Figure 6 – figure supplement 1**
