# Supplementary material for: USP28 deletion and small-molecule inhibition destabilizes c-MYC and elicits regression of squamous cell lung carcinoma
Source: eLife journal article supplement (doi:10.7554/elife.71596), 2021-10-11
Supplement: supp [file elife-71596-supp-v1.zip]

Fbxw7  
Targeting Intron 4 and 5

### Targeting intron 4

oligo donor ...gtagctagaattgccatgcctagccttttacaaccatggGAAGTTCCTATTCTCTAGAAAGTATAGGAAGTTCgatgggatccaagcccttatcttcatcattacatga...

ccactgaatcgagagcttaccattcagctagagtggcagctgtccagtgagcagtgactgtagctagaattgccatgcctagcctttttacaaatgggatccaagcccttatcttcatcattacac

ggtgacttagctctcgaatgggtaagtcgatctaccgtcgacaggtcactcgtcactgacatcgatcttaacggtaacggatcggaataatgttctaccctaggttcgggaatagaagtagtaatgtg

gRNA-Int4B

gRNA-Int4A

### Targeting intron 5

oligo donor      -60bp homology      NcoI      FRT      -60bp homology

...gccgtgtgaccaggtagagagcactgacgagtgaggcctatggGAAGTTCCTATTCTCTAGAAAGTATAGGAACTCcggaggagggaagactccagggtaggatc...

tggtaatgctctgttctatagatcaggcccttggcagccgtgtgaccaggtagagagcactgacgagtgaagcgcaggagggaagactccagggtaggatctcagggtcttcttctgctgagccctggt

gRNA-Int5B

accattacgagacaagatatctagtccggggaaccctcggcacactggtccatctctctgtgactgtcactccgctcctcctctctgaggtcccatcctagagtccacgaagaacgactcggacca

gRNA-Int5A

# B

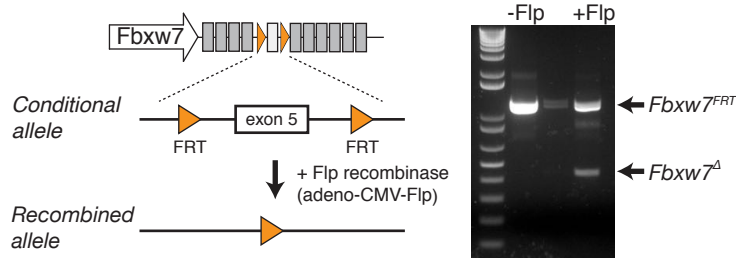

D

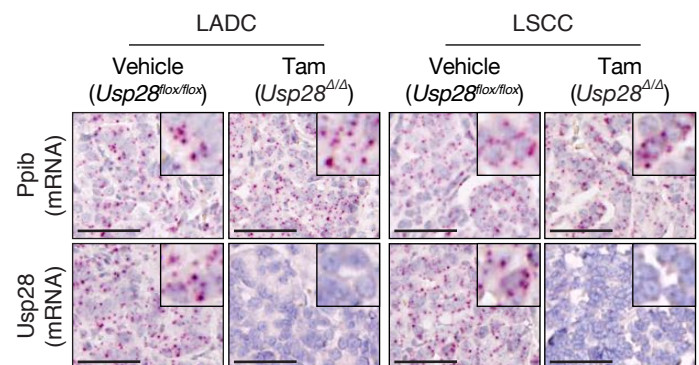

**C**

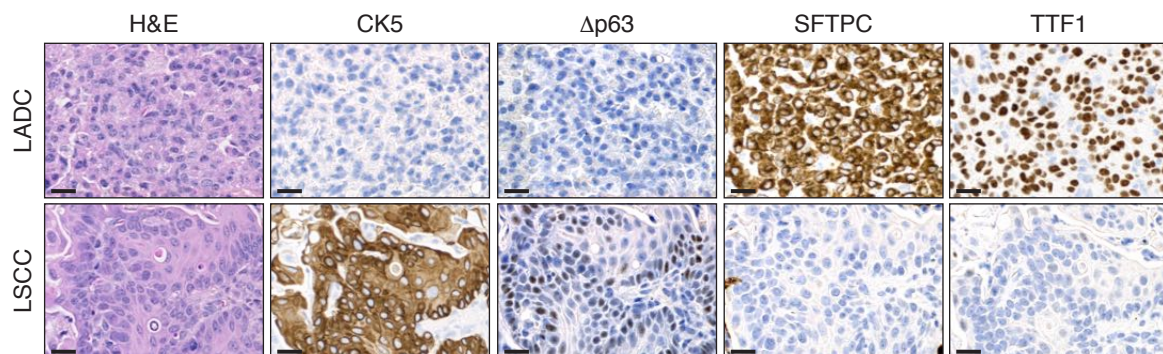

**E**

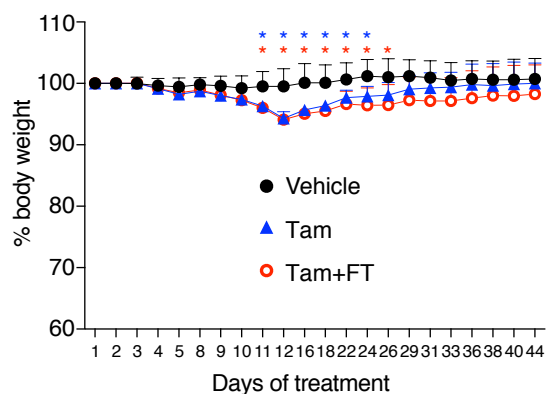

**F**

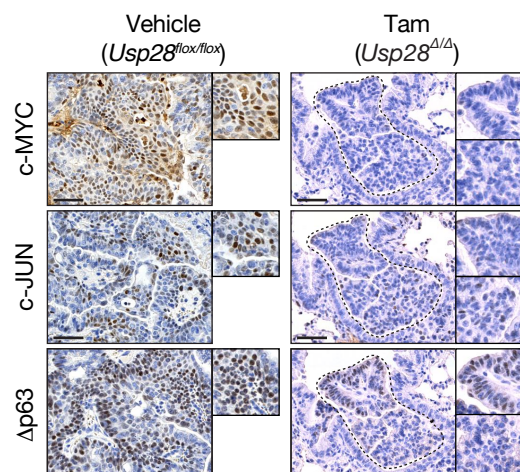

### Figure 2 – figure supplement 1
