# Supplementary material for: USP28 deletion and small-molecule inhibition destabilizes c-MYC and elicits regression of squamous cell lung carcinoma
Source: eLife journal article supplement (doi:10.7554/elife.71596), 2021-10-11
Supplement: supp [file elife_poa_e71596_Figure_5_figure_supplement_1_source_data_1.xlsx]

## Sheet: Fig5-FigS1A
Figure 5 – figure supplement 1A: % body weight
	Day		Vehicle				FT206
	1	100	100	100		100	100	100
	3	101.415	101.86	101.887		98.5849	101.724	101.031
	5	107.075	104.186	104.651		103.302	101.379	102.062
	9	103.302	103.256	104.186		101.887	97.2414	99.6564
	12	105.189	104.186	99.0698		104.245	99.3103	98.9691
	15	102.83	104.186	102.326		103.774	99.6552	97.9381
	17	101.415	105.581	102.791		104.717	100	101.375
	32	99.0566	104.651	100		98.1132	101.724	100.344
	33	102.83	105.581	100		98.5849	103.793	102.405
	35	99.5283	106.977	99.5349		98.5849	102.414	101.375
Number of comparisons per family	10
Alpha	0.05
Bonferroni's multiple comparisons test	Mean Diff.	95.00% CI of diff.	Significant?	Summary	Adjusted P Value
Vehicle - FT206
1	0	-5.462 to 5.462	No	ns	>0.999999999999999
3	1.274	-4.187 to 6.736	No	ns	>0.999999999999999
5	3.057	-2.405 to 8.518	No	ns	>0.999999999999999
9	3.986	-1.475 to 9.448	No	ns	0.361134
12	1.973	-3.488 to 7.435	No	ns	>0.999999999999999
15	2.658	-2.803 to 8.120	No	ns	>0.999999999999999
17	1.232	-4.230 to 6.693	No	ns	>0.999999999999999
32	1.176	-4.286 to 6.637	No	ns	>0.999999999999999
33	1.209	-4.252 to 6.671	No	ns	>0.999999999999999
35	1.222	-4.239 to 6.684	No	ns	>0.999999999999999
Test details	Mean 1	Mean 2	Mean Diff.	SE of diff.	N1	N2	t	DF
Vehicle - FT206
1	100	100	0	1.838	3	3	0	40
3	101.7	100.4	1.274	1.838	3	3	0.6931	40
5	105.3	102.2	3.057	1.838	3	3	1.663	40
9	103.6	99.59	3.986	1.838	3	3	2.169	40
12	102.8	100.8	1.973	1.838	3	3	1.073	40
15	103.1	100.5	2.658	1.838	3	3	1.446	40
17	103.3	102	1.232	1.838	3	3	0.6702	40
32	101.2	100.1	1.176	1.838	3	3	0.6395	40
33	102.8	101.6	1.209	1.838	3	3	0.6579	40
35	102	100.8	1.222	1.838	3	3	0.6649	40
