# Supplementary figures and images for: USP28 deletion and small-molecule inhibition destabilizes c-MYC and elicits regression of squamous cell lung carcinoma
Source: eLife journal article supplement (doi:10.7554/elife.71596), 2021-10-11

**A**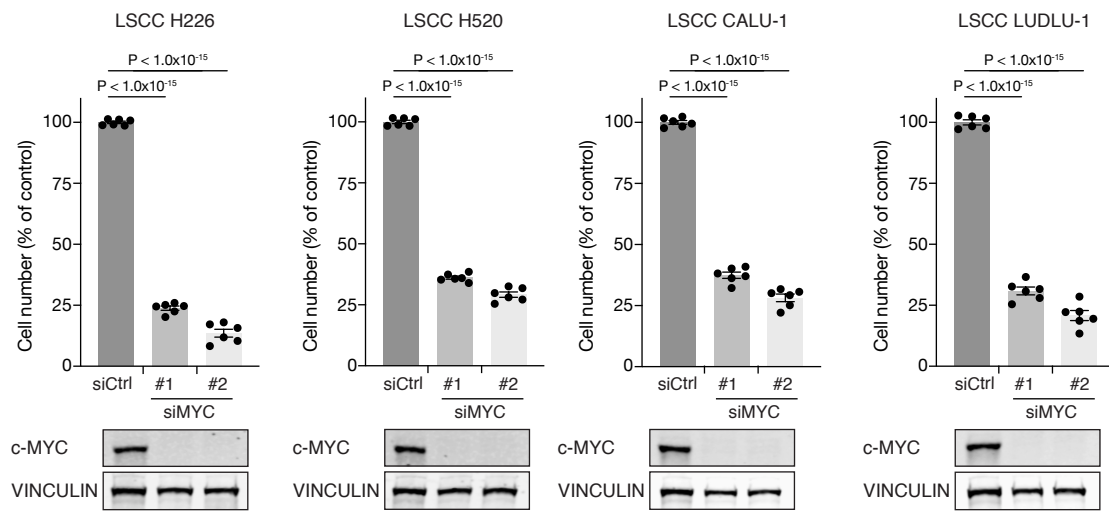**B**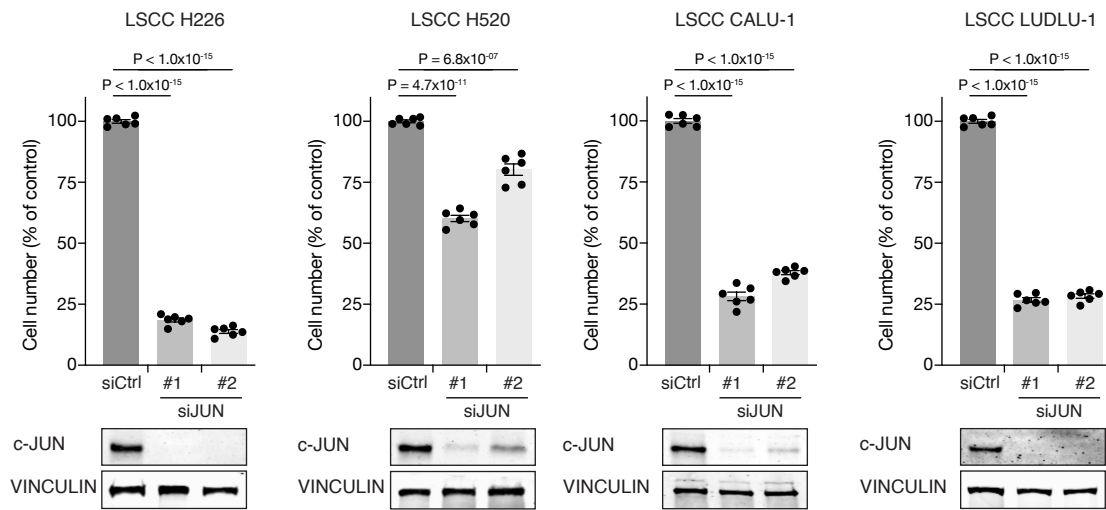**C**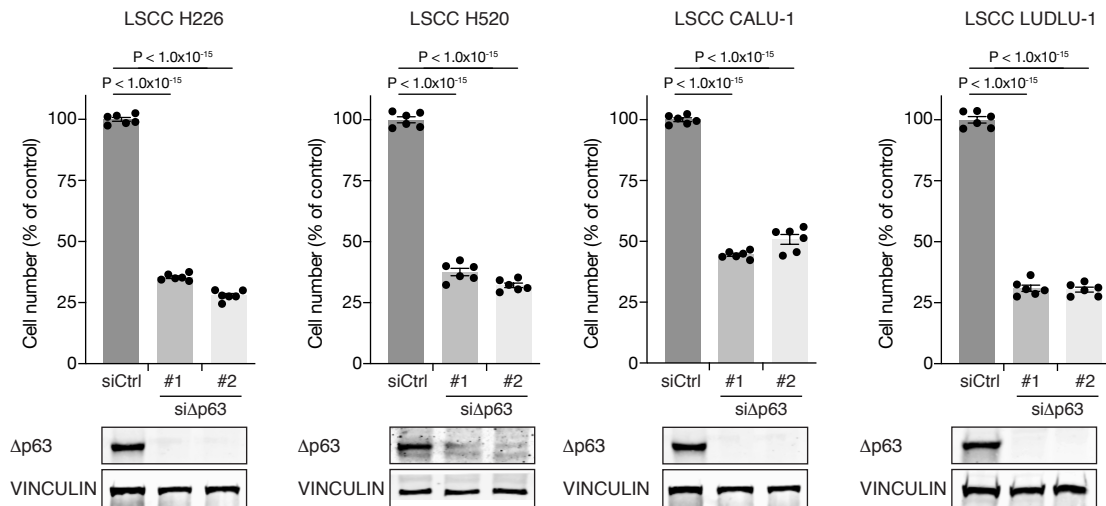**Figure 1 – figure supplement 1**

Supplement: supp [file elife-71596-supp-v1.zip]

**A**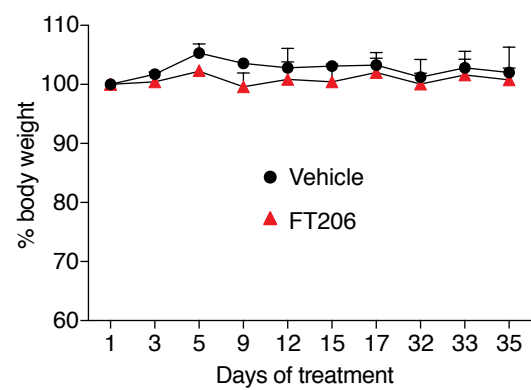**B**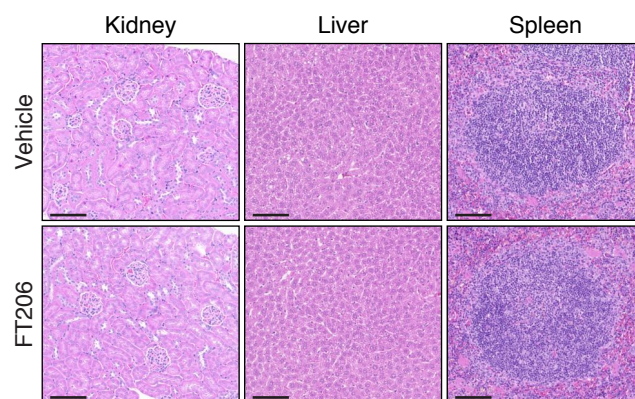

**Figure 5 – figure supplement 1**

Supplement: supp [file elife-71596-supp-v1.zip]

A

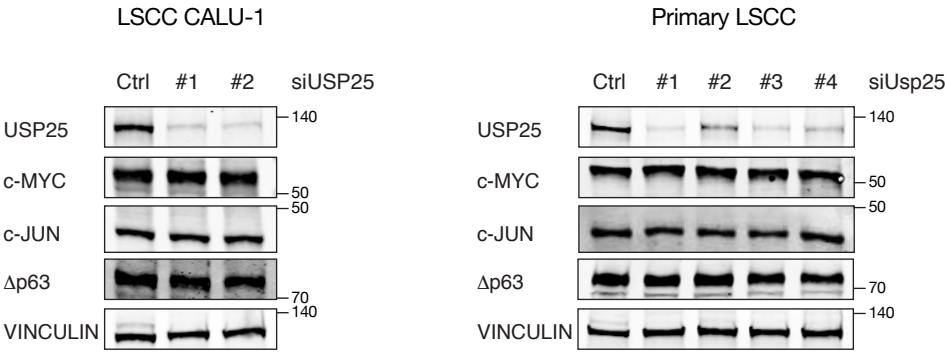

B

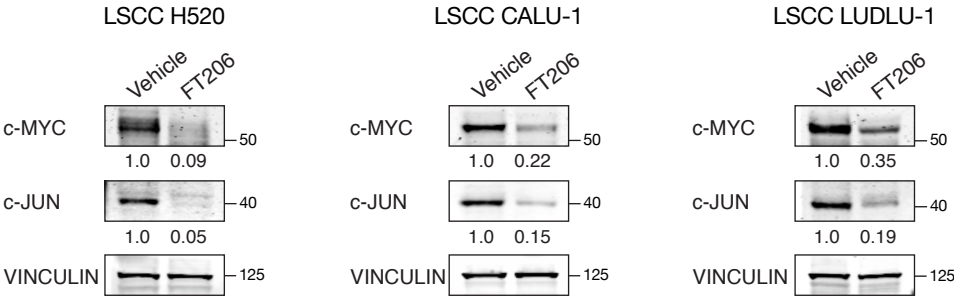

D

| Cell line    | IC50 (μM) |
|--------------|-----------|
| LSCC H520    | 0.1056    |
| LSCC CALU-1  | 0.2221    |
| LSCC LUDLU-1 | 0.3053    |
| LADC H23     | 0.3062    |
| LADC H441    | 1.25      |
| LADC H1650   | 0.3920    |

C

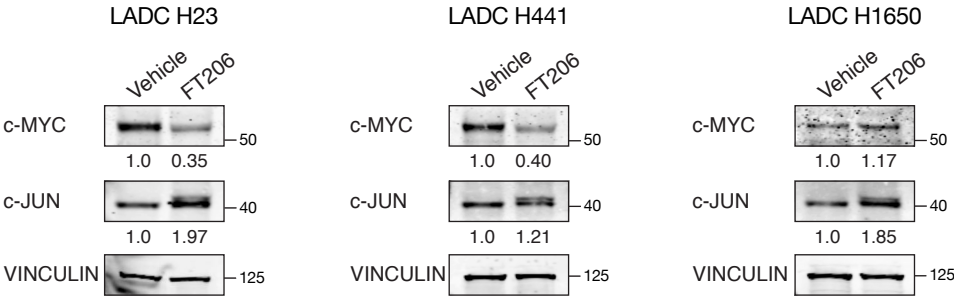

E

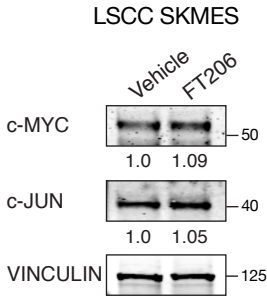

Figure 6 – figure supplement 1

Supplement: supp [file elife-71596-supp-v1.zip]

**A**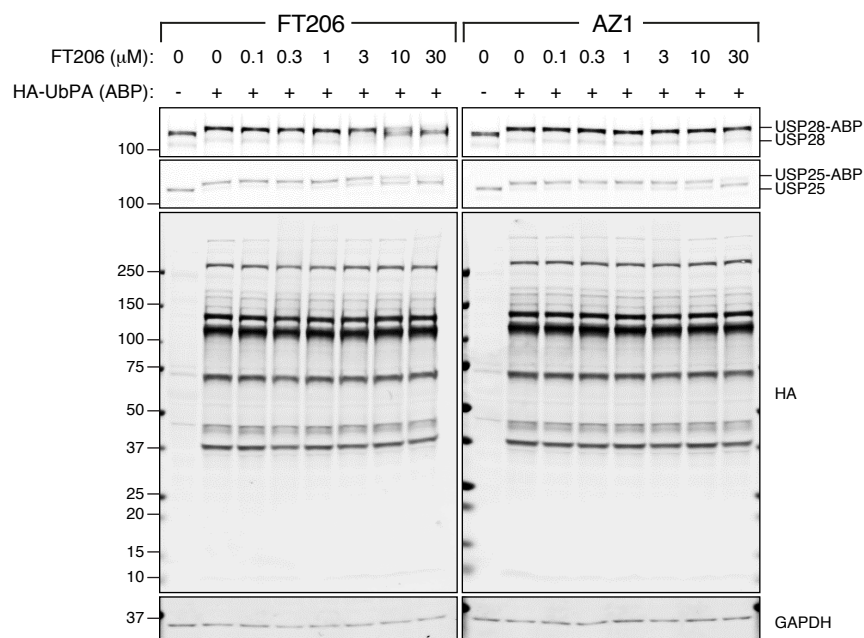**B**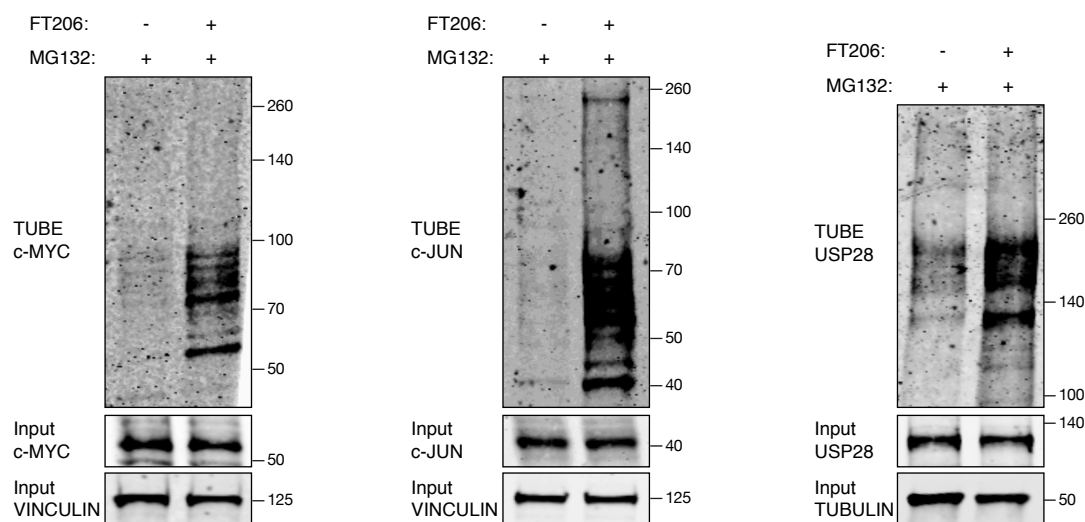**C**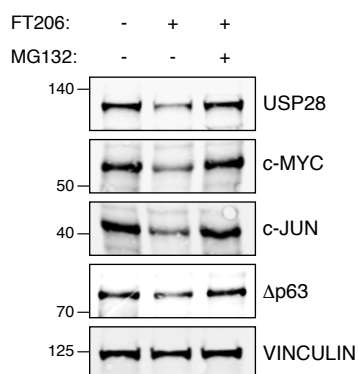**D**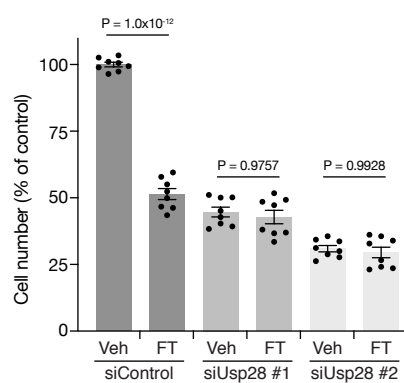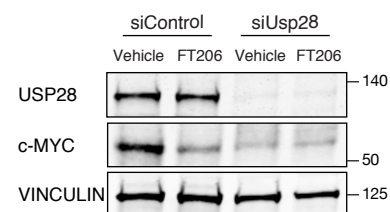**Figure 4 – figure supplement 1**

Supplement: supp [file elife-71596-supp-v1.zip]

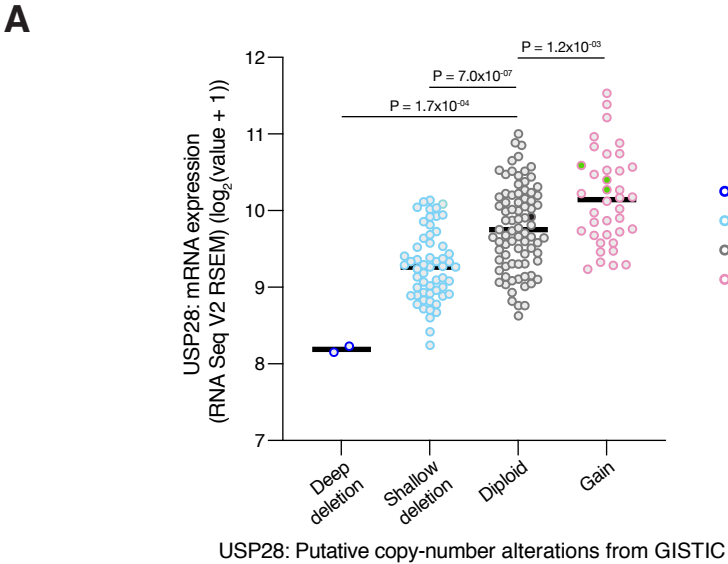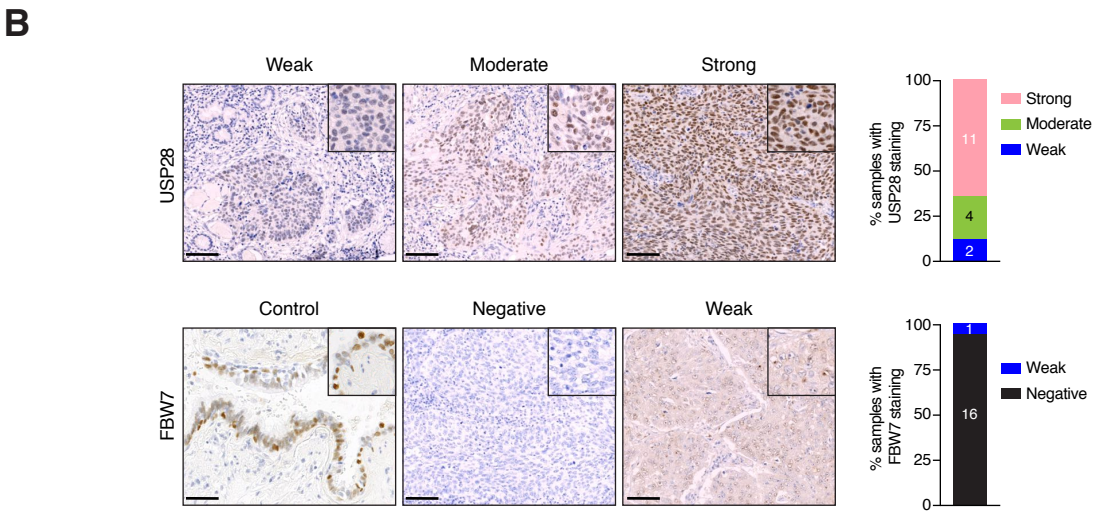

Figure 1 – figure supplement 2

Supplement: supp [file elife-71596-supp-v1.zip]
